# Supplementary material for: Oxy-functionalization of Group 9 and 10 transition metal methyl ligands: use of pyridine-based hemi-labile ligands
Source: Royal Society of Chemistry journal article supplement (doi:10.1039/c4dt00371c), 2014-01-01
Supplement: c4dt00371c1.pdf [file c4dt00371c1.pdf]

Oxy-functionalization of Group 9 and 10 Transition Metal Methyl Ligands: Use of Pyridine-based Hemi-labile Ligands

Center for Catalytic Hydrocarbon Functionalization (CCHF), Department of Chemistry, Center for Advanced Scientific Computing and Modeling (CASCaM); University of North Texas, 1155 Union Circle, #305070, Denton, TX 76203-5017

<sup>∞</sup>Department of Chemistry, University of Virginia, Charlottesville, VA 22904

January 27, 2014

Bruce M. Prince, T. Brent Gunnoe<sup>∞,\*</sup>, Thomas R. Cundari\*

**Full Citation for Gaussian 09**

Gaussian 09, Revision **A.02**, Frisch, M. J.; Trucks, G. W.; Schlegel, H. B.; Scuseria, G. E.; Robb, M. A.; Cheeseman, J. R.; Scalmani, G.; Barone, V.; Mennucci, B.; Petersson, G. A.; Nakatsuji, H.; Caricato, M.; Li, X.; Hratchian, H. P.; Izmaylov, A. F.; Bloino, J.; Zheng, G.; Sonnenberg, J. L.; Hada, M.; Ehara, M.; Toyota, K.; Fukuda, R.; Hasegawa, J.; Ishida, M.; Nakajima, T.; Honda, Y.; Kitao, O.; Nakai, H.; Vreven, T.; Montgomery, J. A., Jr.; Peralta, J. E.; Ogliaro, F.; Bearpark, M.; Heyd, J. J.; Brothers, E.; Kudin, K. N.; Staroverov, V. N.; Kobayashi, R.; Normand, J.; Raghavachari, K.; Rendell, A.; Burant, J. C.; Iyengar, S. S.; Tomasi, J.; Cossi, M.; Rega, N.; Millam, N. J.; Klene, M.; Knox, J. E.; Cross, J. B.; Bakken, V.; Adamo, C.; Jaramillo, J.; Gomperts, R.; Stratmann, R. E.; Yazyev, O.; Austin, A. J.; Cammi, R.; Pomelli, C.; Ochterski, J. W.; Martin, R. L.; Morokuma, K.; Zakrzewski, V. G.; Voth, G. A.; Salvador, P.; Dannenberg, J. J.; Dapprich, S.; Daniels, A. D.; Farkas, Ö.; Foresman, J. B.; Ortiz, J. V.; Cioslowski, J.; Fox, D. J. Gaussian, Inc., Wallingford CT, 2009.

**Table S-1. B3LYP/CEP-31G(d) Optimized coordinates. Atomic number (Column 1). Cartesian coordinates (Columns 2 – 4) in Å.**

**Platinum – HLL Coordinates**

| [(N-O)Pt <sup>II</sup> (Me)(THF)] <sup>+</sup> |              |              |              | [(N-O)Pt <sup>II</sup> (Me)(PyO)] <sup>+</sup> |              |              |              |
|------------------------------------------------|--------------|--------------|--------------|------------------------------------------------|--------------|--------------|--------------|
| 78                                             | 0.132237000  | -0.230405000 | -0.010619000 | 78                                             | -0.158950000 | -0.020226000 | -0.307266000 |
| 6                                              | 0.512374000  | -2.205373000 | -0.355430000 | 6                                              | 0.417717000  | -1.785776000 | -1.154587000 |
| 1                                              | -0.104951000 | -2.574032000 | -1.191464000 | 1                                              | -0.314709000 | -2.088226000 | -1.921627000 |
| 1                                              | 1.573334000  | -2.350221000 | -0.618573000 | 1                                              | 1.396383000  | -1.659469000 | -1.645728000 |
| 1                                              | 0.295115000  | -2.790233000 | 0.556353000  | 1                                              | 0.497558000  | -2.580129000 | -0.389836000 |
| 6                                              | -1.813852000 | 2.052261000  | -0.334150000 | 6                                              | -2.429776000 | 1.906680000  | 0.161457000  |
| 1                                              | -1.649481000 | 2.210712000  | -1.418029000 | 1                                              | -2.513698000 | 2.266938000  | -0.882690000 |
| 1                                              | -2.376677000 | 2.911719000  | 0.066836000  | 1                                              | -3.012174000 | 2.579085000  | 0.813752000  |
| 8                                              | -0.539138000 | 1.945419000  | 0.332571000  | 8                                              | -1.043656000 | 1.914150000  | 0.560646000  |
| 6                                              | 0.311235000  | 3.096851000  | 0.098931000  | 6                                              | -0.407180000 | 3.202572000  | 0.352407000  |
| 1                                              | 1.246975000  | 2.907763000  | 0.639079000  | 1                                              | 0.637855000  | 3.084126000  | 0.662565000  |
| 1                                              | 0.510518000  | 3.217326000  | -0.980662000 | 1                                              | -0.453169000 | 3.486947000  | -0.713093000 |
| 1                                              | -0.176780000 | 4.001747000  | 0.497487000  | 1                                              | -0.907910000 | 3.963190000  | 0.974336000  |
| 7                                              | -1.888685000 | -0.403738000 | -0.024689000 | 7                                              | -2.103707000 | -0.542195000 | -0.010602000 |
| 6                                              | -2.566175000 | -1.572424000 | 0.139395000  | 6                                              | -2.569014000 | -1.819906000 | 0.028041000  |
| 6                                              | -2.597445000 | 0.764284000  | -0.113130000 | 6                                              | -2.969222000 | 0.483907000  | 0.258353000  |

|                                       |              |              |              |              |              |              |              |
|---------------------------------------|--------------|--------------|--------------|--------------|--------------|--------------|--------------|
| 6                                     | -3.972655000 | -1.631745000 | 0.202765000  | 6            | -3.912578000 | -2.130969000 | 0.319033000  |
| 1                                     | -1.962199000 | -2.474343000 | 0.221633000  | 1            | -1.842119000 | -2.603552000 | -0.180991000 |
| 6                                     | -4.007425000 | 0.783528000  | -0.041642000 | 6            | -4.325308000 | 0.248173000  | 0.573727000  |
| 6                                     | -4.712820000 | -0.431876000 | 0.108106000  | 6            | -4.813442000 | -1.078034000 | 0.596541000  |
| 1                                     | -4.460570000 | -2.599211000 | 0.330651000  | 1            | -4.229075000 | -3.175123000 | 0.329765000  |
| 1                                     | -4.535639000 | 1.737219000  | -0.104269000 | 1            | -4.980621000 | 1.093555000  | 0.793767000  |
| 1                                     | -5.803901000 | -0.438480000 | 0.160466000  | 1            | -5.860441000 | -1.281079000 | 0.832875000  |
| 8                                     | 2.200635000  | 0.149000000  | 0.068887000  | 8            | 1.725653000  | 0.778740000  | -0.597581000 |
| 6                                     | 3.043667000  | 0.145660000  | -1.158695000 | 7            | 2.838678000  | 0.199507000  | -0.070014000 |
| 6                                     | 2.998957000  | -0.298232000 | 1.235862000  | 6            | 2.794186000  | -0.579230000 | 1.050886000  |
| 6                                     | 4.418045000  | -0.388747000 | -0.702381000 | 6            | 4.019172000  | 0.481718000  | -0.696846000 |
| 1                                     | 3.084218000  | 1.189021000  | -1.507391000 | 6            | 3.981184000  | -1.113373000 | 1.590716000  |
| 6                                     | 4.451633000  | -0.033463000 | 0.807381000  | 1            | 1.797646000  | -0.738936000 | 1.464336000  |
| 1                                     | 2.651858000  | 0.287959000  | 2.097414000  | 6            | 5.231596000  | -0.023743000 | -0.192470000 |
| 1                                     | 4.475421000  | -1.479605000 | -0.842723000 | 1            | 3.929650000  | 1.109415000  | -1.584143000 |
| 1                                     | 4.714480000  | 1.025471000  | 0.959732000  | 6            | 5.220635000  | -0.836561000 | 0.967607000  |
| 1                                     | 2.798873000  | -1.367723000 | 1.404965000  | 1            | 3.915574000  | -1.732787000 | 2.486551000  |
| 1                                     | 5.237987000  | 0.077428000  | -1.267759000 | 1            | 6.158264000  | 0.218535000  | -0.714951000 |
| 1                                     | 2.543279000  | -0.478159000 | -1.910306000 | 1            | 6.150537000  | -1.241900000 | 1.372472000  |
| 1                                     | 5.159251000  | -0.656270000 | 1.373946000  |              |              |              |              |
| <b><sup>+</sup>OAT<sup>#</sup> Pt</b> |              |              |              |              |              |              |              |
|                                       | 78           | 0.284822000  | -0.459993000 | 0.083526000  |              |              |              |
|                                       | 6            | 0.408001000  | -0.433539000 | 2.156277000  |              |              |              |
|                                       | 1            | 0.340890000  | 0.621196000  | 2.458346000  |              |              |              |
|                                       | 1            | -0.448099000 | -1.017684000 | 2.511059000  |              |              |              |
|                                       | 1            | 1.365745000  | -0.887439000 | 2.441260000  |              |              |              |
|                                       | 6            | 2.095308000  | 2.152352000  | 0.014578000  |              |              |              |
|                                       | 1            | 2.141060000  | 2.493376000  | 1.066828000  |              |              |              |
|                                       | 1            | 2.381219000  | 2.991176000  | -0.641688000 |              |              |              |
|                                       | 8            | 0.754377000  | 1.725286000  | -0.300670000 |              |              |              |
|                                       | 6            | -0.289412000 | 2.699057000  | 0.010760000  |              |              |              |
|                                       | 1            | -1.244018000 | 2.204432000  | -0.212512000 |              |              |              |
|                                       | 1            | -0.237406000 | 2.980369000  | 1.076142000  |              |              |              |
|                                       | 1            | -0.146665000 | 3.583474000  | -0.630271000 |              |              |              |
|                                       | 7            | 2.410016000  | -0.270442000 | -0.137809000 |              |              |              |
|                                       | 6            | 3.164856000  | -1.393008000 | -0.273970000 |              |              |              |
|                                       | 6            | 3.006690000  | 0.952095000  | -0.196824000 |              |              |              |
|                                       | 6            | 4.558444000  | -1.339666000 | -0.476941000 |              |              |              |
|                                       | 1            | 2.629620000  | -2.343112000 | -0.220592000 |              |              |              |
|                                       | 6            | 4.396529000  | 1.090232000  | -0.409986000 |              |              |              |
|                                       | 6            | 5.186923000  | -0.073640000 | -0.547451000 |              |              |              |
|                                       | 1            | 5.122945000  | -2.267478000 | -0.580531000 |              |              |              |
|                                       | 1            | 4.842144000  | 2.085907000  | -0.465530000 |              |              |              |
|                                       | 1            | 6.264117000  | 0.006223000  | -0.711156000 |              |              |              |
|                                       | 8            | -1.170444000 | -1.481359000 | 0.140029000  |              |              |              |
|                                       | 7            | -3.196582000 | 0.249473000  | -0.180855000 |              |              |              |
|                                       | 6            | -3.772135000 | -0.137360000 | -1.340747000 |              |              |              |
|                                       | 6            | -4.007746000 | 0.460281000  | 0.879157000  |              |              |              |
|                                       | 6            | -5.169564000 | -0.307816000 | -1.505766000 |              |              |              |
|                                       | 1            | -3.092758000 | -0.326194000 | -2.180223000 |              |              |              |
|                                       | 6            | -5.417154000 | 0.319883000  | 0.832067000  |              |              |              |
|                                       | 1            | -3.518339000 | 0.755175000  | 1.815800000  |              |              |              |
|                                       | 6            | -6.010216000 | -0.072101000 | -0.392068000 |              |              |              |
|                                       | 1            | -5.573439000 | -0.618692000 | -2.471848000 |              |              |              |
|                                       | 1            | -6.017931000 | 0.510032000  | 1.724360000  |              |              |              |
|                                       | 1            | -7.093878000 | -0.196544000 | -0.473234000 |              |              |              |

| <b>[N~O)Pt<sup>IV</sup>(O)(Me)]<sup>+</sup></b> |              |              |              | <b>[(N~O)Pt<sup>IV</sup>(Py)(O)(Me)]<sup>+</sup></b> |             |              |              |
|-------------------------------------------------|--------------|--------------|--------------|------------------------------------------------------|-------------|--------------|--------------|
| 78                                              | -0.929005000 | -0.364143000 | -0.154538000 | 78                                                   | 0.088312000 | -0.276279000 | 0.039652000  |
| 6                                               | -1.214601000 | -0.289150000 | 1.910276000  | 8                                                    | 0.214768000 | -2.103123000 | -0.215240000 |

|                                         |              |              |              |           |              |              |              |
|-----------------------------------------|--------------|--------------|--------------|-----------|--------------|--------------|--------------|
| 1                                       | -1.445061000 | 0.755770000  | 2.158104000  | 6         | 0.083159000  | 0.441834000  | 2.002686000  |
| 1                                       | -2.058863000 | -0.957248000 | 2.110911000  | 1         | 0.261099000  | 1.529089000  | 1.998596000  |
| 1                                       | -0.285304000 | -0.640156000 | 2.376451000  | 1         | -0.890222000 | 0.205751000  | 2.452777000  |
| 6                                       | 0.996659000  | 2.107642000  | 0.182073000  | 1         | 0.887068000  | -0.083016000 | 2.534033000  |
| 1                                       | 0.889011000  | 2.405564000  | 1.242375000  | 6         | -1.996769000 | 2.085386000  | -0.084648000 |
| 1                                       | 1.429504000  | 2.949376000  | -0.382582000 | 1         | -2.523846000 | 2.805698000  | -0.732728000 |
| 8                                       | -0.301042000 | 1.777996000  | -0.366054000 | 1         | -1.990200000 | 2.488721000  | 0.946759000  |
| 6                                       | -1.293824000 | 2.843917000  | -0.224248000 | 8         | -0.644341000 | 1.918047000  | -0.549957000 |
| 1                                       | -2.200584000 | 2.494086000  | -0.731462000 | 6         | 0.071312000  | 3.172636000  | -0.662829000 |
| 1                                       | -1.492850000 | 3.038714000  | 0.842272000  | 1         | 1.038516000  | 2.943610000  | -1.128028000 |
| 1                                       | -0.907260000 | 3.748292000  | -0.719071000 | 1         | -0.492871000 | 3.861037000  | -1.313768000 |
| 7                                       | 1.182973000  | -0.319701000 | -0.038656000 | 1         | 0.216620000  | 3.634502000  | 0.330561000  |
| 6                                       | 1.868655000  | -1.492940000 | -0.106366000 | 7         | -1.986852000 | -0.397892000 | -0.032528000 |
| 6                                       | 1.855950000  | 0.860671000  | 0.061688000  | 6         | -2.596791000 | -1.612909000 | -0.011067000 |
| 6                                       | 3.276714000  | -1.530349000 | -0.077294000 | 6         | -2.723541000 | 0.742917000  | -0.117309000 |
| 1                                       | 1.270117000  | -2.402144000 | -0.187664000 | 6         | -3.999408000 | -1.732606000 | -0.080186000 |
| 6                                       | 3.267310000  | 0.902560000  | 0.085074000  | 1         | -1.912610000 | -2.463369000 | 0.041589000  |
| 6                                       | 3.989418000  | -0.311313000 | 0.018987000  | 6         | -4.132461000 | 0.695394000  | -0.209035000 |
| 1                                       | 3.788495000  | -2.492089000 | -0.134338000 | 6         | -4.782747000 | -0.559857000 | -0.181186000 |
| 1                                       | 3.781119000  | 1.863867000  | 0.153738000  | 1         | -4.452834000 | -2.724750000 | -0.061658000 |
| 1                                       | 5.081700000  | -0.304713000 | 0.036711000  | 1         | -4.700793000 | 1.623652000  | -0.299830000 |
| 8                                       | -2.217229000 | -1.573557000 | -0.326700000 | 1         | -5.871935000 | -0.618273000 | -0.245207000 |
|                                         |              |              |              | 7         | 2.185451000  | -0.204671000 | -0.038579000 |
|                                         |              |              |              | 6         | 2.869550000  | 0.914605000  | 0.323958000  |
|                                         |              |              |              | 6         | 2.878002000  | -1.289910000 | -0.480459000 |
|                                         |              |              |              | 6         | 4.273657000  | 1.003684000  | 0.248359000  |
|                                         |              |              |              | 6         | 4.286613000  | -1.280181000 | -0.585594000 |
|                                         |              |              |              | 6         | 5.001069000  | -0.117324000 | -0.219625000 |
|                                         |              |              |              | 1         | 2.278426000  | 1.753568000  | 0.692504000  |
|                                         |              |              |              | 1         | 2.262620000  | -2.157175000 | -0.725200000 |
|                                         |              |              |              | 1         | 4.771424000  | 1.925489000  | 0.554145000  |
|                                         |              |              |              | 1         | 4.796510000  | -2.174595000 | -0.947360000 |
|                                         |              |              |              | 1         | 6.091240000  | -0.083636000 | -0.292098000 |
| <b>+Methyl Migration<sup>‡</sup> Pt</b> |              |              |              | <b>Py</b> |              |              |              |
| 78                                      | 0.067973000  | -0.193896000 | -0.015536000 | 6         | -1.150745000 | -0.733908000 | -0.000217000 |
| 8                                       | 0.245671000  | -2.109723000 | 0.031291000  | 6         | -1.215583000 | 0.684354000  | -0.000119000 |
| 6                                       | 0.235569000  | -1.215388000 | 1.984754000  | 6         | 0.000315000  | 1.408768000  | 0.000056000  |
| 1                                       | 0.202907000  | -0.245098000 | 2.510537000  | 6         | 1.215891000  | 0.683825000  | 0.000207000  |
| 1                                       | -0.632558000 | -1.839961000 | 2.195928000  | 6         | 1.150417000  | -0.734406000 | 0.000149000  |
| 1                                       | 1.186937000  | -1.733105000 | 2.100663000  | 7         | -0.000322000 | -1.441058000 | -0.000092000 |
| 6                                       | -1.923316000 | 2.128059000  | 0.184970000  | 1         | 0.000524000  | 2.503340000  | 0.000213000  |
| 1                                       | -2.429976000 | 2.964342000  | -0.324027000 | 1         | -2.075339000 | -1.325386000 | -0.000367000 |
| 1                                       | -1.849452000 | 2.361910000  | 1.265013000  | 1         | -2.183366000 | 1.192478000  | -0.000224000 |
| 8                                       | -0.589982000 | 1.970732000  | -0.356734000 | 1         | 2.183921000  | 1.191480000  | 0.000365000  |
| 6                                       | 0.200675000  | 3.184230000  | -0.265997000 | 1         | 2.074742000  | -1.326301000 | 0.000202000  |
| 1                                       | 1.154141000  | 2.977889000  | -0.767391000 |           |              |              |              |
| 1                                       | -0.323460000 | 4.000275000  | -0.789735000 |           |              |              |              |
| 1                                       | 0.367876000  | 3.459150000  | 0.790695000  |           |              |              |              |
| 7                                       | -1.986171000 | -0.324227000 | -0.054434000 |           |              |              |              |
| 6                                       | -2.616245000 | -1.519789000 | -0.193227000 |           |              |              |              |
| 6                                       | -2.702154000 | 0.834221000  | -0.022427000 |           |              |              |              |
| 6                                       | -4.020458000 | -1.601601000 | -0.296958000 |           |              |              |              |
| 1                                       | -1.943878000 | -2.381716000 | -0.220378000 |           |              |              |              |
| 6                                       | -4.108852000 | 0.829203000  | -0.138074000 |           |              |              |              |
| 6                                       | -4.780381000 | -0.409520000 | -0.269964000 |           |              |              |              |
| 1                                       | -4.493790000 | -2.578686000 | -0.405373000 |           |              |              |              |
| 1                                       | -4.660223000 | 1.771792000  | -0.123752000 |           |              |              |              |
| 1                                       | -5.868985000 | -0.438799000 | -0.358815000 |           |              |              |              |
| 7                                       | 2.127696000  | -0.097621000 | -0.105114000 |           |              |              |              |
| 6                                       | 2.843050000  | 0.832965000  | 0.584340000  |           |              |              |              |
| 6                                       | 2.788277000  | -1.022114000 | -0.857224000 |           |              |              |              |
| 6                                       | 4.249356000  | 0.898152000  | 0.530159000  |           |              |              |              |

|                                                   |              |              |              |                                  |              |              |              |
|---------------------------------------------------|--------------|--------------|--------------|----------------------------------|--------------|--------------|--------------|
| 6                                                 | 4.196781000  | -1.019121000 | -0.968922000 |                                  |              |              |              |
| 6                                                 | 4.942642000  | -0.044710000 | -0.268223000 |                                  |              |              |              |
| 1                                                 | 2.268812000  | 1.525736000  | 1.202418000  |                                  |              |              |              |
| 1                                                 | 2.161633000  | -1.767644000 | -1.344365000 |                                  |              |              |              |
| 1                                                 | 4.776385000  | 1.661265000  | 1.105502000  |                                  |              |              |              |
| 1                                                 | 4.682393000  | -1.773948000 | -1.589594000 |                                  |              |              |              |
| 1                                                 | 6.033474000  | -0.022158000 | -0.334339000 |                                  |              |              |              |
| <b>PyO</b>                                        |              |              |              | <b>THF</b>                       |              |              |              |
| 6                                                 | 0.291298000  | -1.189525000 | -0.000188000 | 6                                | -1.174217000 | -0.433075000 | -0.135694000 |
| 6                                                 | -1.116124000 | -1.212065000 | -0.000123000 | 8                                | 0.000004000  | -1.265896000 | 0.000000000  |
| 6                                                 | -1.849993000 | 0.000002000  | 0.000094000  | 6                                | 1.174218000  | -0.433069000 | 0.135694000  |
| 6                                                 | -1.116116000 | 1.212068000  | 0.000219000  | 6                                | 0.738482000  | 1.006589000  | -0.234389000 |
| 6                                                 | 0.291303000  | 1.189526000  | 0.000145000  | 6                                | -0.738487000 | 1.006586000  | 0.234388000  |
| 7                                                 | 0.995081000  | -0.000002000 | -0.000042000 | 1                                | -1.535852000 | -0.481407000 | -1.182448000 |
| 1                                                 | -2.942045000 | 0.000007000  | 0.000143000  | 1                                | -1.964554000 | -0.830701000 | 0.524467000  |
| 1                                                 | 0.923470000  | -2.078191000 | -0.000346000 | 1                                | 1.535853000  | -0.481398000 | 1.182449000  |
| 1                                                 | -1.618286000 | -2.182215000 | -0.000239000 | 1                                | 1.964559000  | -0.830692000 | -0.524465000 |
| 1                                                 | -1.618275000 | 2.182219000  | 0.000377000  | 1                                | 1.355573000  | 1.774980000  | 0.258325000  |
| 1                                                 | 0.923481000  | 2.078188000  | 0.000237000  | 1                                | 0.794515000  | 1.159614000  | -1.325777000 |
| 8                                                 | 2.295484000  | -0.000004000 | -0.000096000 | 1                                | -0.794520000 | 1.159609000  | 1.325777000  |
|                                                   |              |              |              | 1                                | -1.355583000 | 1.774974000  | -0.258324000 |
| <b>Methyl Migration – Four Coordinate -Pt</b>     |              |              |              | <b>Pt<sup>II</sup>-Methoxide</b> |              |              |              |
| 78                                                | -0.852751000 | -0.269905000 | -0.193279000 | 78                               | 0.031315000  | -0.117444000 | -0.045719000 |
| 6                                                 | -2.341521000 | -0.763531000 | 1.590605000  | 6                                | -1.928340000 | 2.182682000  | -0.202412000 |
| 1                                                 | -3.399921000 | -0.745983000 | 1.329783000  | 1                                | -1.936870000 | 2.473908000  | -1.269784000 |
| 1                                                 | -1.988440000 | -1.690060000 | 2.043030000  | 1                                | -2.369407000 | 2.998313000  | 0.393157000  |
| 1                                                 | -1.998934000 | 0.149237000  | 2.099040000  | 8                                | -0.548037000 | 1.989556000  | 0.214891000  |
| 6                                                 | 1.074141000  | 2.056805000  | 0.369891000  | 6                                | 0.296794000  | 3.103602000  | -0.199652000 |
| 1                                                 | 0.869945000  | 2.252096000  | 1.439838000  | 1                                | 1.293495000  | 2.919855000  | 0.216224000  |
| 1                                                 | 1.570642000  | 2.935922000  | -0.070683000 | 1                                | 0.344292000  | 3.155295000  | -1.300149000 |
| 8                                                 | -0.176306000 | 1.812340000  | -0.323863000 | 1                                | -0.115794000 | 4.037325000  | 0.214294000  |
| 6                                                 | -1.151942000 | 2.892342000  | -0.181100000 | 7                                | -2.008808000 | -0.273399000 | -0.072426000 |
| 1                                                 | -2.009840000 | 2.618362000  | -0.806253000 | 6                                | -2.661554000 | -1.463980000 | -0.042456000 |
| 1                                                 | -1.450937000 | 2.995502000  | 0.875167000  | 6                                | -2.715022000 | 0.890453000  | -0.029448000 |
| 1                                                 | -0.696294000 | 3.824135000  | -0.550114000 | 6                                | -4.067057000 | -1.536513000 | 0.047646000  |
| 7                                                 | 1.201115000  | -0.346254000 | -0.006751000 | 1                                | -2.020163000 | -2.344291000 | -0.110337000 |
| 6                                                 | 1.849085000  | -1.535902000 | -0.135135000 | 6                                | -4.122149000 | 0.898980000  | 0.083999000  |
| 6                                                 | 1.908756000  | 0.800420000  | 0.203062000  | 6                                | -4.810926000 | -0.336026000 | 0.122352000  |
| 6                                                 | 3.252795000  | -1.623352000 | -0.049957000 | 1                                | -4.554233000 | -2.512589000 | 0.064387000  |
| 1                                                 | 1.224574000  | -2.413007000 | -0.310977000 | 1                                | -4.660275000 | 1.848211000  | 0.131682000  |
| 6                                                 | 3.317273000  | 0.790125000  | 0.287406000  | 1                                | -5.899933000 | -0.357638000 | 0.207192000  |
| 6                                                 | 4.001023000  | -0.441848000 | 0.164969000  | 7                                | 2.087697000  | 0.031192000  | -0.009778000 |
| 1                                                 | 3.734146000  | -2.596436000 | -0.157295000 | 6                                | 2.800991000  | -0.557822000 | -1.008673000 |
| 1                                                 | 3.858184000  | 1.725645000  | 0.444728000  | 6                                | 2.754272000  | 0.648832000  | 1.004575000  |
| 1                                                 | 5.091000000  | -0.476554000 | 0.228380000  | 6                                | 4.212632000  | -0.527746000 | -1.039322000 |
| 8                                                 | -2.093067000 | -1.581446000 | -0.293647000 | 1                                | 2.216735000  | -1.070313000 | -1.773014000 |
|                                                   |              |              |              | 6                                | 4.161937000  | 0.717704000  | 1.051811000  |
|                                                   |              |              |              | 1                                | 2.137896000  | 1.077073000  | 1.797951000  |
|                                                   |              |              |              | 6                                | 4.908344000  | 0.121152000  | 0.006644000  |
|                                                   |              |              |              | 1                                | 4.739758000  | -1.010157000 | -1.864217000 |
|                                                   |              |              |              | 1                                | 4.648463000  | 1.217875000  | 1.891052000  |
|                                                   |              |              |              | 1                                | 6.000806000  | 0.156045000  | 0.012565000  |
|                                                   |              |              |              | 8                                | 0.270831000  | -2.057474000 | -0.361709000 |
|                                                   |              |              |              | 6                                | 0.676085000  | -2.816098000 | 0.782838000  |
|                                                   |              |              |              | 1                                | 0.790457000  | -3.861429000 | 0.440860000  |
|                                                   |              |              |              | 1                                | 1.647087000  | -2.481969000 | 1.198139000  |
|                                                   |              |              |              | 1                                | -0.075516000 | -2.797381000 | 1.598667000  |
| <b>Pt<sup>II</sup>-Methoxide- Four Coordinate</b> |              |              |              |                                  |              |              |              |
|                                                   | 78           | -0.866483000 | 0.030400000  | -0.132948000                     |              |              |              |
|                                                   | 6            | 1.375347000  | 1.924448000  | 0.493978000                      |              |              |              |
|                                                   | 1            | 1.201304000  | 2.075311000  | 1.575637000                      |              |              |              |

## Nickel – HLL Coordinates

| [(N~O)Ni <sup>II</sup> (Me)(THF)] <sup>+</sup> |              |              |              | [(N~O)Ni <sup>II</sup> (Me)(PyO)] <sup>+</sup> |              |              |              |
|------------------------------------------------|--------------|--------------|--------------|------------------------------------------------|--------------|--------------|--------------|
| 6                                              | 1.121101000  | -2.536564000 | 0.071290000  | 6                                              | 0.416105000  | -1.626350000 | -0.997065000 |
| 1                                              | 1.064613000  | -3.046497000 | -0.909943000 | 1                                              | -0.279030000 | -1.970684000 | -1.781685000 |
| 1                                              | 2.184277000  | -2.399731000 | 0.326850000  | 1                                              | 1.405723000  | -1.486332000 | -1.462419000 |
| 1                                              | 0.668133000  | -3.184972000 | 0.842523000  | 1                                              | 0.497357000  | -2.406711000 | -0.215630000 |
| 6                                              | -2.690382000 | -0.952854000 | 0.311213000  | 6                                              | -2.428947000 | 1.867618000  | 0.021441000  |
| 1                                              | -2.851843000 | -1.178375000 | 1.382286000  | 1                                              | -2.540966000 | 2.291258000  | -0.996266000 |
| 1                                              | -3.604596000 | -1.214886000 | -0.246704000 | 1                                              | -2.977650000 | 2.511653000  | 0.730282000  |
| 8                                              | -1.588431000 | -1.756373000 | -0.184147000 | 8                                              | -1.035443000 | 1.818685000  | 0.374334000  |
| 6                                              | -1.897410000 | -3.182750000 | -0.149989000 | 6                                              | -0.395008000 | 3.120338000  | 0.306092000  |
| 1                                              | -1.100216000 | -3.701131000 | -0.689036000 | 1                                              | 0.650533000  | 2.967655000  | 0.592559000  |
| 1                                              | -1.949748000 | -3.533381000 | 0.893728000  | 1                                              | -0.451524000 | 3.518600000  | -0.721989000 |
| 1                                              | -2.861328000 | -3.339402000 | -0.659096000 | 1                                              | -0.895411000 | 3.806039000  | 1.010038000  |
| 7                                              | -1.012703000 | 0.772613000  | -0.037975000 | 7                                              | -2.049319000 | -0.551741000 | -0.110059000 |
| 6                                              | -0.619361000 | 2.060437000  | -0.195833000 | 6                                              | -2.491151000 | -1.837257000 | -0.085313000 |
| 6                                              | -2.334157000 | 0.512006000  | 0.113441000  | 6                                              | -2.963952000 | 0.444829000  | 0.064469000  |
| 6                                              | -1.527057000 | 3.140437000  | -0.202093000 | 6                                              | -3.846383000 | -2.180208000 | 0.095560000  |
| 1                                              | 0.453748000  | 2.217232000  | -0.319261000 | 1                                              | -1.735457000 | -2.610221000 | -0.213491000 |
| 6                                              | -3.320936000 | 1.524971000  | 0.112542000  | 6                                              | -4.340709000 | 0.190485000  | 0.257185000  |
| 6                                              | -2.907007000 | 2.867125000  | -0.043452000 | 6                                              | -4.796038000 | -1.146381000 | 0.264856000  |
| 1                                              | -1.159129000 | 4.159522000  | -0.332516000 | 1                                              | -4.136946000 | -3.231917000 | 0.104260000  |
| 1                                              | -4.376272000 | 1.267581000  | 0.228477000  | 1                                              | -5.031221000 | 1.024819000  | 0.399234000  |
| 1                                              | -3.641510000 | 3.676015000  | -0.048725000 | 1                                              | -5.854934000 | -1.373181000 | 0.409433000  |

|   |              |              |              |
|---|--------------|--------------|--------------|
| 1 | 2.018582000  | 2.731891000  | 0.110388000  |
| 8 | 0.102175000  | 1.949741000  | -0.205995000 |
| 6 | -0.681924000 | 3.160671000  | 0.049108000  |
| 1 | -1.575328000 | 3.085680000  | -0.582395000 |
| 1 | -0.955861000 | 3.214616000  | 1.115117000  |
| 1 | -0.080326000 | 4.033183000  | -0.248868000 |
| 7 | 1.087227000  | -0.441606000 | -0.023436000 |
| 6 | 1.519928000  | -1.710496000 | -0.257483000 |
| 6 | 1.981545000  | 0.557607000  | 0.232470000  |
| 6 | 2.890458000  | -2.035206000 | -0.223813000 |
| 1 | 0.751572000  | -2.452688000 | -0.476389000 |
| 6 | 3.368702000  | 0.303916000  | 0.269592000  |
| 6 | 3.831438000  | -1.013710000 | 0.046530000  |
| 1 | 3.198664000  | -3.064369000 | -0.413484000 |
| 1 | 4.063056000  | 1.123042000  | 0.467903000  |
| 1 | 4.900914000  | -1.234463000 | 0.073010000  |
| 8 | -2.131681000 | -1.373684000 | -0.227573000 |
| 6 | -2.519916000 | -2.202259000 | 0.881381000  |
| 1 | -1.826834000 | -3.061960000 | 0.955827000  |
| 1 | -2.554864000 | -1.655448000 | 1.837561000  |
| 1 | -3.523193000 | -2.592996000 | 0.637639000  |

|    |             |              |              |    |              |              |              |
|----|-------------|--------------|--------------|----|--------------|--------------|--------------|
| 8  | 1.754839000 | 0.172486000  | -0.007414000 | 8  | 1.462316000  | 0.863571000  | -0.254942000 |
| 6  | 2.537113000 | 0.323305000  | 1.233903000  | 7  | 2.640513000  | 0.239483000  | -0.021212000 |
| 6  | 2.731970000 | 0.074046000  | -1.109016000 | 6  | 2.790123000  | -0.604710000 | 1.041418000  |
| 6  | 3.717408000 | 1.242272000  | 0.833423000  | 6  | 3.683578000  | 0.531935000  | -0.850730000 |
| 1  | 2.870480000 | -0.674442000 | 1.559990000  | 6  | 4.038878000  | -1.196998000 | 1.309267000  |
| 6  | 3.849296000 | 1.073827000  | -0.720424000 | 1  | 1.891410000  | -0.768197000 | 1.635854000  |
| 1  | 3.093873000 | -0.963989000 | -1.162063000 | 6  | 4.955597000  | -0.027841000 | -0.622079000 |
| 1  | 3.500940000 | 2.288695000  | 1.093453000  | 1  | 3.445155000  | 1.213839000  | -1.667651000 |
| 1  | 4.834093000 | 0.681925000  | -1.012811000 | 6  | 5.142531000  | -0.907525000 | 0.470982000  |
| 1  | 2.192001000 | 0.324343000  | -2.031957000 | 1  | 4.129389000  | -1.867712000 | 2.165111000  |
| 1  | 4.633885000 | 0.944700000  | 1.362899000  | 1  | 5.771231000  | 0.225972000  | -1.300840000 |
| 1  | 1.858657000 | 0.749199000  | 1.985329000  | 1  | 6.120018000  | -1.354993000 | 0.664182000  |
| 1  | 3.704199000 | 2.037866000  | -1.229283000 | 28 | -0.219599000 | 0.016795000  | -0.251562000 |
| 28 | 0.152855000 | -0.883036000 | -0.027352000 |    |              |              |              |

**+OAT<sup>‡</sup> - Ni**

|  |    |              |              |              |
|--|----|--------------|--------------|--------------|
|  | 6  | -0.186434000 | -0.550987000 | 2.577419000  |
|  | 1  | 0.820266000  | -0.517949000 | 3.022316000  |
|  | 1  | -0.924412000 | -0.062632000 | 3.223619000  |
|  | 1  | -0.485873000 | -1.583964000 | 2.335127000  |
|  | 6  | 2.133202000  | 1.665038000  | -0.674817000 |
|  | 1  | 2.649153000  | 2.231422000  | 0.126144000  |
|  | 1  | 2.512115000  | 2.023480000  | -1.647917000 |
|  | 8  | 0.715883000  | 1.872118000  | -0.576443000 |
|  | 6  | 0.352377000  | 3.278223000  | -0.488380000 |
|  | 1  | -0.730965000 | 3.307220000  | -0.326387000 |
|  | 1  | 0.865220000  | 3.749406000  | 0.367607000  |
|  | 1  | 0.628697000  | 3.786483000  | -1.427548000 |
|  | 7  | 1.536880000  | -0.536353000 | 0.258178000  |
|  | 6  | 1.775467000  | -1.860449000 | 0.447442000  |
|  | 6  | 2.407567000  | 0.175036000  | -0.513396000 |
|  | 6  | 2.884552000  | -2.530205000 | -0.108185000 |
|  | 1  | 1.056367000  | -2.397851000 | 1.066219000  |
|  | 6  | 3.541216000  | -0.419079000 | -1.114853000 |
|  | 6  | 3.791647000  | -1.793199000 | -0.904484000 |
|  | 1  | 3.023261000  | -3.595488000 | 0.082606000  |
|  | 1  | 4.208716000  | 0.188811000  | -1.729462000 |
|  | 1  | 4.662997000  | -2.274818000 | -1.354526000 |
|  | 8  | -1.419056000 | 1.404332000  | 1.233882000  |
|  | 7  | -1.877487000 | -0.062258000 | 0.008522000  |
|  | 6  | -1.914955000 | 0.150146000  | -1.331229000 |
|  | 6  | -2.832050000 | -0.810049000 | 0.616497000  |
|  | 6  | -2.915190000 | -0.436211000 | -2.138638000 |
|  | 1  | -1.134361000 | 0.790103000  | -1.743869000 |
|  | 6  | -3.858270000 | -1.430321000 | -0.124843000 |
|  | 1  | -2.774643000 | -0.879965000 | 1.702160000  |
|  | 6  | -3.903639000 | -1.242443000 | -1.528219000 |
|  | 1  | -2.907233000 | -0.250745000 | -3.214276000 |
|  | 1  | -4.606106000 | -2.028249000 | 0.399006000  |
|  | 1  | -4.695268000 | -1.701027000 | -2.125926000 |
|  | 28 | -0.064687000 | 0.429337000  | 0.922600000  |

| <b>[N~O)Ni<sup>IV</sup>(O)(Me)]<sup>+</sup></b> |              |              | <b>[(N~O)Ni<sup>IV</sup>(Py)(O)(Me)]<sup>+</sup></b> |   |              |              |              |
|-------------------------------------------------|--------------|--------------|------------------------------------------------------|---|--------------|--------------|--------------|
| 6                                               | -1.683540000 | -1.016657000 | 1.581394000                                          | 8 | 0.169534000  | -2.020764000 | -0.297664000 |
| 1                                               | -1.197028000 | -0.189639000 | 2.119228000                                          | 6 | 0.147526000  | -0.555308000 | 2.037046000  |
| 1                                               | -2.777460000 | -0.969718000 | 1.582295000                                          | 1 | 0.896799000  | -1.319939000 | 2.259495000  |
| 1                                               | -1.301856000 | -2.004661000 | 1.852410000                                          | 1 | 0.448216000  | 0.450698000  | 2.363582000  |
| 6                                               | 0.107910000  | 1.996530000  | 0.100210000                                          | 1 | -0.855882000 | -0.843045000 | 2.367927000  |
| 1                                               | -0.003989000 | 2.382428000  | 1.130729000                                          | 6 | -1.563574000 | 1.962551000  | 0.491006000  |
| 1                                               | 0.316986000  | 2.842328000  | -0.575680000                                         | 1 | -1.962200000 | 2.920800000  | 0.124545000  |
| 8                                               | -1.119338000 | 1.345620000  | -0.309369000                                         | 1 | -1.430276000 | 2.035941000  | 1.581891000  |



|    |             |              |             |
|----|-------------|--------------|-------------|
| 28 | 0.092567000 | -0.367476000 | 0.054813000 |
|----|-------------|--------------|-------------|

| <b>PyO</b>                                         |              |              |              | <b>THF</b>                       |              |              |              |
|----------------------------------------------------|--------------|--------------|--------------|----------------------------------|--------------|--------------|--------------|
| 6                                                  | 0.291298000  | -1.189525000 | -0.000188000 | 6                                | -1.174217000 | -0.433075000 | -0.135694000 |
| 6                                                  | -1.116124000 | -1.212065000 | -0.000123000 | 8                                | 0.000004000  | -1.265896000 | 0.000000000  |
| 6                                                  | -1.849993000 | 0.000002000  | 0.000094000  | 6                                | 1.174218000  | -0.433069000 | 0.135694000  |
| 6                                                  | -1.116116000 | 1.212068000  | 0.000219000  | 6                                | 0.738482000  | 1.006589000  | -0.234389000 |
| 6                                                  | 0.291303000  | 1.189526000  | 0.000145000  | 6                                | -0.738487000 | 1.006586000  | 0.234388000  |
| 7                                                  | 0.995081000  | -0.000002000 | -0.000042000 | 1                                | -1.535852000 | -0.481407000 | -1.182448000 |
| 1                                                  | -2.942045000 | 0.000007000  | 0.000143000  | 1                                | -1.964554000 | -0.830701000 | 0.524467000  |
| 1                                                  | 0.923470000  | -2.078191000 | -0.000346000 | 1                                | 1.535853000  | -0.481398000 | 1.182449000  |
| 1                                                  | -1.618286000 | -2.182215000 | -0.000239000 | 1                                | 1.964559000  | -0.830692000 | -0.524465000 |
| 1                                                  | -1.618275000 | 2.182219000  | 0.000377000  | 1                                | 1.355573000  | 1.774980000  | 0.258325000  |
| 1                                                  | 0.923481000  | 2.078188000  | 0.000237000  | 1                                | 0.794515000  | 1.159614000  | -1.325777000 |
| 8                                                  | 2.295484000  | -0.000004000 | -0.000096000 | 1                                | -0.794520000 | 1.159609000  | 1.325777000  |
|                                                    |              |              |              | 1                                | -1.355583000 | 1.774974000  | -0.258324000 |
| <b>Methyl Migration – Four-Coordinate -Ni</b>      |              |              |              | <b>Ni<sup>II</sup>-Methoxide</b> |              |              |              |
| 6                                                  | -1.915913000 | -1.449621000 | 1.390044000  | 6                                | 2.879252000  | 1.001364000  | 0.241130000  |
| 1                                                  | -1.327092000 | -2.348423000 | 1.584032000  | 1                                | 3.124755000  | 1.237475000  | 1.294943000  |
| 1                                                  | -1.653699000 | -0.588758000 | 2.025549000  | 1                                | 3.742274000  | 1.278697000  | -0.388752000 |
| 1                                                  | -2.988354000 | -1.633225000 | 1.310353000  | 8                                | 1.720426000  | 1.745926000  | -0.165630000 |
| 6                                                  | 0.231859000  | 2.037524000  | -0.009955000 | 6                                | 1.891569000  | 3.193179000  | -0.057026000 |
| 1                                                  | 0.396214000  | 2.776409000  | 0.791634000  | 1                                | 0.923444000  | 3.625614000  | -0.325052000 |
| 1                                                  | 0.255998000  | 2.555195000  | -0.986678000 | 1                                | 2.159751000  | 3.454455000  | 0.980185000  |
| 8                                                  | -1.064458000 | 1.410801000  | 0.173630000  | 1                                | 2.685930000  | 3.498704000  | -0.757060000 |
| 6                                                  | -2.201132000 | 2.293396000  | -0.098880000 | 7                                | 1.230750000  | -0.783951000 | -0.024173000 |
| 1                                                  | -3.105338000 | 1.716071000  | 0.130780000  | 6                                | 0.885872000  | -2.093804000 | -0.146951000 |
| 1                                                  | -2.133170000 | 3.171233000  | 0.561922000  | 6                                | 2.551358000  | -0.474970000 | 0.088644000  |
| 1                                                  | -2.194464000 | 2.596822000  | -1.158146000 | 6                                | 1.830502000  | -3.138891000 | -0.152132000 |
| 7                                                  | 0.776891000  | -0.335545000 | -0.123147000 | 1                                | -0.177635000 | -2.309617000 | -0.248237000 |
| 6                                                  | 1.620709000  | -1.402352000 | -0.152132000 | 6                                | 3.568274000  | -1.457588000 | 0.084402000  |
| 6                                                  | 1.269044000  | 0.924304000  | 0.028222000  | 6                                | 3.203416000  | -2.816227000 | -0.031923000 |
| 6                                                  | 3.015018000  | -1.241911000 | -0.026827000 | 1                                | 1.492213000  | -4.171313000 | -0.253383000 |
| 1                                                  | 1.159276000  | -2.382249000 | -0.284342000 | 1                                | 4.615083000  | -1.157053000 | 0.168836000  |
| 6                                                  | 2.652838000  | 1.165039000  | 0.172982000  | 1                                | 3.966155000  | -3.598393000 | -0.037077000 |
| 6                                                  | 3.538740000  | 0.063058000  | 0.141593000  | 7                                | -1.597824000 | -0.237109000 | 0.005182000  |
| 1                                                  | 3.662591000  | -2.119248000 | -0.059895000 | 6                                | -2.279123000 | -0.479155000 | -1.146120000 |
| 1                                                  | 3.021080000  | 2.185089000  | 0.302582000  | 6                                | -2.114990000 | -0.675663000 | 1.182881000  |
| 1                                                  | 4.614740000  | 0.219670000  | 0.247965000  | 6                                | -3.500325000 | -1.187739000 | -1.165920000 |
| 8                                                  | -1.854627000 | -1.869677000 | -0.759654000 | 1                                | -1.836290000 | -0.085158000 | -2.063277000 |
| 28                                                 | -1.109297000 | -0.516621000 | -0.270922000 | 6                                | -3.331840000 | -1.388549000 | 1.255209000  |
|                                                    |              |              |              | 1                                | -1.541133000 | -0.443483000 | 2.082791000  |
|                                                    |              |              |              | 6                                | -4.037553000 | -1.652628000 | 0.057638000  |
|                                                    |              |              |              | 1                                | -4.009178000 | -1.357268000 | -2.116444000 |
|                                                    |              |              |              | 1                                | -3.706893000 | -1.717563000 | 2.225923000  |
|                                                    |              |              |              | 1                                | -4.983249000 | -2.200333000 | 0.078031000  |
|                                                    |              |              |              | 8                                | -0.814371000 | 2.346803000  | -0.093097000 |
|                                                    |              |              |              | 6                                | -2.179226000 | 2.634690000  | 0.152313000  |
|                                                    |              |              |              | 1                                | -2.529399000 | 2.275755000  | 1.142633000  |
|                                                    |              |              |              | 1                                | -2.289158000 | 3.735754000  | 0.144461000  |
|                                                    |              |              |              | 1                                | -2.858707000 | 2.231819000  | -0.627427000 |
|                                                    |              |              |              | 28                               | 0.012143000  | 0.761549000  | -0.045400000 |
| <b>Ni<sup>II</sup>-Methoxide - Four Coordinate</b> |              |              |              |                                  |              |              |              |
|                                                    | 6            | 0.606087000  | 2.075312000  | 0.278563000                      |              |              |              |
|                                                    | 1            | 0.564120000  | 2.384500000  | 1.339207000                      |              |              |              |
|                                                    | 1            | 1.034734000  | 2.895976000  | -0.319404000                     |              |              |              |
|                                                    | 8            | -0.739572000 | 1.793900000  | -0.191806000                     |              |              |              |
|                                                    | 6            | -1.704447000 | 2.863066000  | 0.071422000                      |              |              |              |
|                                                    | 1            | -2.651048000 | 2.550068000  | -0.387799000                     |              |              |              |
|                                                    | 1            | -1.824329000 | 3.001972000  | 1.158076000                      |              |              |              |

## Palladium – HLL Coordinates

| [(N~O)Pd <sup>II</sup> (Me)(THF)] <sup>+</sup> |              |              |              | [(N~O)Pd <sup>II</sup> (Me)(PyO)] <sup>+</sup> |              |              |              |
|------------------------------------------------|--------------|--------------|--------------|------------------------------------------------|--------------|--------------|--------------|
| 6                                              | 0.501924000  | -2.256163000 | -0.337368000 | 6                                              | 0.403976000  | -1.786633000 | -1.124437000 |
| 1                                              | -0.116476000 | -2.594766000 | -1.184050000 | 1                                              | -0.312357000 | -2.068775000 | -1.912868000 |
| 1                                              | 1.567423000  | -2.408563000 | -0.569389000 | 1                                              | 1.405494000  | -1.668682000 | -1.566274000 |
| 1                                              | 0.238417000  | -2.796708000 | 0.588050000  | 1                                              | 0.424608000  | -2.551266000 | -0.327683000 |
| 6                                              | -1.787360000 | 2.004993000  | -0.321778000 | 6                                              | -2.490201000 | 1.886487000  | 0.091757000  |
| 1                                              | -1.666375000 | 2.184343000  | -1.409068000 | 1                                              | -2.587992000 | 2.256586000  | -0.948709000 |
| 1                                              | -2.327502000 | 2.862960000  | 0.113787000  | 1                                              | -3.073698000 | 2.550705000  | 0.752506000  |
| 8                                              | -0.490372000 | 1.878485000  | 0.290614000  | 8                                              | -1.104066000 | 1.901016000  | 0.478604000  |
| 6                                              | 0.343740000  | 3.042281000  | 0.071938000  | 6                                              | -0.487578000 | 3.201916000  | 0.306336000  |
| 1                                              | 1.304630000  | 2.834650000  | 0.559284000  | 1                                              | 0.565304000  | 3.085275000  | 0.590700000  |
| 1                                              | 0.495066000  | 3.213629000  | -1.009098000 | 1                                              | -0.557380000 | 3.525633000  | -0.747291000 |
| 1                                              | -0.126664000 | 3.928365000  | 0.531033000  | 1                                              | -0.983532000 | 3.936452000  | 0.963622000  |
| 7                                              | -1.898361000 | -0.457748000 | -0.043777000 | 7                                              | -2.169672000 | -0.565435000 | -0.092336000 |
| 6                                              | -2.597140000 | -1.611844000 | 0.109239000  | 6                                              | -2.643959000 | -1.836949000 | -0.070427000 |
| 6                                              | -2.582788000 | 0.722269000  | -0.099330000 | 6                                              | -3.028532000 | 0.460762000  | 0.177106000  |
| 6                                              | -4.004060000 | -1.648452000 | 0.198543000  | 6                                              | -3.991662000 | -2.147019000 | 0.207057000  |
| 1                                              | -2.012958000 | -2.530167000 | 0.162299000  | 1                                              | -1.922067000 | -2.625931000 | -0.282018000 |
| 6                                              | -3.992587000 | 0.771768000  | -0.002682000 | 6                                              | -4.391171000 | 0.233379000  | 0.479470000  |
| 6                                              | -4.719754000 | -0.431303000 | 0.139521000  | 6                                              | -4.886965000 | -1.089805000 | 0.487330000  |
| 1                                              | -4.510391000 | -2.607714000 | 0.316822000  | 1                                              | -4.315891000 | -3.188911000 | 0.205324000  |
| 1                                              | -4.502999000 | 1.736575000  | -0.039958000 | 1                                              | -5.044027000 | 1.080422000  | 0.701036000  |
| 1                                              | -5.809743000 | -0.416187000 | 0.212030000  | 1                                              | -5.937158000 | -1.288089000 | 0.714096000  |
| 8                                              | 2.253635000  | 0.083350000  | 0.059275000  | 8                                              | 1.710545000  | 0.808050000  | -0.551531000 |
| 6                                              | 3.111150000  | 0.064584000  | -1.151601000 | 7                                              | 2.840119000  | 0.218597000  | -0.097959000 |
| 6                                              | 3.042221000  | -0.327065000 | 1.240164000  | 6                                              | 2.837557000  | -0.597246000 | 0.998490000  |
| 6                                              | 4.490058000  | -0.441882000 | -0.672350000 | 6                                              | 4.000530000  | 0.514419000  | -0.757131000 |

|    |              |              |              |
|----|--------------|--------------|--------------|
| 1  | -1.344493000 | 3.787498000  | -0.405357000 |
| 7  | 0.667157000  | -0.340999000 | -0.044873000 |
| 6  | 1.285091000  | -1.544200000 | -0.180314000 |
| 6  | 1.406852000  | 0.790241000  | 0.121663000  |
| 6  | 2.688709000  | -1.662861000 | -0.137419000 |
| 1  | 0.635578000  | -2.406961000 | -0.333534000 |
| 6  | 2.817292000  | 0.755262000  | 0.165713000  |
| 6  | 3.467785000  | -0.494149000 | 0.040390000  |
| 1  | 3.148845000  | -2.645748000 | -0.248641000 |
| 1  | 3.384451000  | 1.679959000  | 0.292693000  |
| 1  | 4.558265000  | -0.552463000 | 0.071686000  |
| 8  | -2.031584000 | -1.566919000 | -0.340779000 |
| 6  | -2.233866000 | -2.607823000 | 0.611800000  |
| 1  | -1.447473000 | -3.382654000 | 0.510636000  |
| 1  | -2.272469000 | -2.242300000 | 1.654125000  |
| 1  | -3.199085000 | -3.087634000 | 0.366330000  |
| 28 | -1.181749000 | -0.087863000 | -0.176933000 |

|    |             |              |              |    |              |              |              |
|----|-------------|--------------|--------------|----|--------------|--------------|--------------|
| 1  | 3.145753000 | 1.099490000  | -1.527550000 | 6  | 4.039673000  | -1.153848000 | 1.477425000  |
| 6  | 4.500181000 | -0.056561000 | 0.829891000  | 1  | 1.858025000  | -0.767821000 | 1.447088000  |
| 1  | 2.681534000 | 0.271242000  | 2.088885000  | 6  | 5.228609000  | -0.012196000 | -0.314296000 |
| 1  | 4.564109000 | -1.534661000 | -0.789950000 | 1  | 3.883160000  | 1.172203000  | -1.619020000 |
| 1  | 4.749311000 | 1.008270000  | 0.963838000  | 6  | 5.257334000  | -0.861665000 | 0.818294000  |
| 1  | 2.856502000 | -1.396584000 | 1.433273000  | 1  | 4.003763000  | -1.801617000 | 2.354763000  |
| 1  | 5.310129000 | 0.023426000  | -1.238229000 | 1  | 6.136610000  | 0.244200000  | -0.862311000 |
| 1  | 2.632985000 | -0.583225000 | -1.899537000 | 1  | 6.199472000  | -1.283352000 | 1.175209000  |
| 1  | 5.206542000 | -0.659693000 | 1.418981000  | 46 | -0.182021000 | -0.015681000 | -0.334447000 |
| 46 | 0.166731000 | -0.285236000 | -0.026940000 |    |              |              |              |

**\*OAT<sup>‡</sup> - Pd**

|  |    |              |              |              |
|--|----|--------------|--------------|--------------|
|  | 6  | 0.329002000  | -1.199196000 | -2.364266000 |
|  | 1  | -0.629658000 | -1.295388000 | -2.894658000 |
|  | 1  | 1.123976000  | -0.831309000 | -3.024671000 |
|  | 1  | 0.614274000  | -2.127376000 | -1.845757000 |
|  | 6  | -2.126406000 | 1.762542000  | 0.591766000  |
|  | 1  | -2.549838000 | 2.256052000  | -0.306171000 |
|  | 1  | -2.533512000 | 2.265513000  | 1.485582000  |
|  | 8  | -0.691036000 | 1.884069000  | 0.567408000  |
|  | 6  | -0.247225000 | 3.258111000  | 0.381276000  |
|  | 1  | 0.842493000  | 3.219182000  | 0.267221000  |
|  | 1  | -0.695175000 | 3.682703000  | -0.533419000 |
|  | 1  | -0.532295000 | 3.858088000  | 1.262070000  |
|  | 7  | -1.764279000 | -0.578296000 | -0.140067000 |
|  | 6  | -2.141371000 | -1.879665000 | -0.206235000 |
|  | 6  | -2.521908000 | 0.287436000  | 0.593513000  |
|  | 6  | -3.288516000 | -2.382712000 | 0.443685000  |
|  | 1  | -1.504718000 | -2.538495000 | -0.799671000 |
|  | 6  | -3.675945000 | -0.138252000 | 1.291917000  |
|  | 6  | -4.073656000 | -1.492426000 | 1.211122000  |
|  | 1  | -3.545106000 | -3.438966000 | 0.348098000  |
|  | 1  | -4.249607000 | 0.581292000  | 1.880184000  |
|  | 1  | -4.965225000 | -1.841044000 | 1.737709000  |
|  | 8  | 1.581065000  | 1.218856000  | -1.433936000 |
|  | 7  | 1.999115000  | -0.151730000 | 0.156157000  |
|  | 6  | 1.976295000  | 0.163447000  | 1.472672000  |
|  | 6  | 3.019190000  | -0.870019000 | -0.366635000 |
|  | 6  | 2.999527000  | -0.268238000 | 2.348667000  |
|  | 1  | 1.133833000  | 0.764733000  | 1.819725000  |
|  | 6  | 4.071469000  | -1.345336000 | 0.444934000  |
|  | 1  | 3.000887000  | -1.031403000 | -1.444495000 |
|  | 6  | 4.063981000  | -1.038814000 | 1.827250000  |
|  | 1  | 2.945606000  | 0.000380000  | 3.405317000  |
|  | 1  | 4.878759000  | -1.920963000 | -0.011528000 |
|  | 1  | 4.872725000  | -1.383002000 | 2.476948000  |
|  | 46 | 0.059171000  | 0.237511000  | -0.935237000 |

| <b>[N~O)Pd<sup>IV</sup>(O)(Me)]<sup>+</sup></b> |              |              |              | <b>[(N~O)Pd<sup>IV</sup>(Py)(O)(Me)]<sup>+</sup></b> |              |              |              |
|-------------------------------------------------|--------------|--------------|--------------|------------------------------------------------------|--------------|--------------|--------------|
| 6                                               | 1.312589000  | -2.519954000 | -0.355644000 | 8                                                    | 0.223177000  | -2.139120000 | -0.196714000 |
| 1                                               | 0.658663000  | -2.792964000 | -1.199846000 | 6                                                    | 0.117449000  | 0.010958000  | 2.064663000  |
| 1                                               | 2.370635000  | -2.707183000 | -0.573480000 | 1                                                    | 0.808488000  | 0.844096000  | 2.248743000  |
| 1                                               | 1.006468000  | -2.980186000 | 0.593751000  | 1                                                    | -0.913491000 | 0.235064000  | 2.363171000  |
| 6                                               | -0.610669000 | 2.121534000  | -0.273767000 | 1                                                    | 0.476493000  | -0.937409000 | 2.480106000  |
| 1                                               | -0.641182000 | 2.451783000  | -1.331827000 | 6                                                    | -1.985495000 | 2.049228000  | 0.016762000  |
| 1                                               | -0.976948000 | 2.952061000  | 0.355271000  | 1                                                    | -2.501517000 | 2.791136000  | -0.616597000 |
| 8                                               | 0.720356000  | 1.764956000  | 0.099459000  | 1                                                    | -2.003165000 | 2.419702000  | 1.061272000  |
| 6                                               | 1.686059000  | 2.852075000  | 0.026673000  | 8                                                    | -0.622830000 | 1.901876000  | -0.421669000 |
| 1                                               | 2.638692000  | 2.432465000  | 0.372293000  | 6                                                    | 0.058309000  | 3.173625000  | -0.545308000 |
| 1                                               | 1.773543000  | 3.213699000  | -1.012146000 | 1                                                    | 1.032258000  | 2.970733000  | -1.009045000 |
| 1                                               | 1.367973000  | 3.669182000  | 0.694765000  | 1                                                    | -0.520984000 | 3.844335000  | -1.202062000 |

|                                           |              |              |              |            |              |              |              |
|-------------------------------------------|--------------|--------------|--------------|------------|--------------|--------------|--------------|
| 7                                         | -0.978496000 | -0.342841000 | -0.036528000 | 1          | 0.190877000  | 3.646384000  | 0.444915000  |
| 6                                         | -1.785818000 | -1.429080000 | 0.137138000  | 7          | -1.980167000 | -0.433526000 | -0.038108000 |
| 6                                         | -1.525557000 | 0.909533000  | -0.088267000 | 6          | -2.591568000 | -1.644705000 | -0.080302000 |
| 6                                         | -3.184417000 | -1.317692000 | 0.228689000  | 6          | -2.712991000 | 0.709675000  | -0.078888000 |
| 1                                         | -1.293315000 | -2.399365000 | 0.201417000  | 6          | -3.994965000 | -1.760415000 | -0.160013000 |
| 6                                         | -2.925118000 | 1.094412000  | 0.003398000  | 1          | -1.906464000 | -2.496579000 | -0.057061000 |
| 6                                         | -3.767044000 | -0.028588000 | 0.156764000  | 6          | -4.123246000 | 0.671922000  | -0.175218000 |
| 1                                         | -3.788871000 | -2.216496000 | 0.358765000  | 6          | -4.775412000 | -0.581988000 | -0.208849000 |
| 1                                         | -3.336351000 | 2.105361000  | -0.039317000 | 1          | -4.450982000 | -2.751209000 | -0.189366000 |
| 1                                         | -4.849457000 | 0.099242000  | 0.233246000  | 1          | -4.689711000 | 1.604787000  | -0.222801000 |
| 8                                         | 2.523563000  | -0.394087000 | 0.958009000  | 1          | -5.864550000 | -0.635082000 | -0.279476000 |
| 46                                        | 1.103655000  | -0.488872000 | -0.127540000 | 7          | 2.213861000  | -0.232524000 | -0.048879000 |
|                                           |              |              |              | 6          | 2.890004000  | 0.906226000  | 0.255810000  |
|                                           |              |              |              | 6          | 2.911165000  | -1.335432000 | -0.428768000 |
|                                           |              |              |              | 6          | 4.294868000  | 1.000218000  | 0.180513000  |
|                                           |              |              |              | 6          | 4.321136000  | -1.325611000 | -0.531852000 |
|                                           |              |              |              | 6          | 5.028192000  | -0.141006000 | -0.222664000 |
|                                           |              |              |              | 1          | 2.294768000  | 1.763373000  | 0.577277000  |
|                                           |              |              |              | 1          | 2.298076000  | -2.216675000 | -0.629672000 |
|                                           |              |              |              | 1          | 4.787943000  | 1.939270000  | 0.438262000  |
|                                           |              |              |              | 1          | 4.837210000  | -2.235017000 | -0.844532000 |
|                                           |              |              |              | 1          | 6.118521000  | -0.106035000 | -0.296099000 |
|                                           |              |              |              | 46         | 0.107455000  | -0.315582000 | 0.017209000  |
| <b>*Methyl Migration<sup>‡</sup> - Pd</b> |              |              |              | <b>Py</b>  |              |              |              |
| 8                                         | 0.225608000  | -2.136310000 | -0.043775000 | 6          | -1.150745000 | -0.733908000 | -0.000217000 |
| 6                                         | 0.202354000  | -1.122002000 | 1.992839000  | 6          | -1.215583000 | 0.684354000  | -0.000119000 |
| 1                                         | 0.171842000  | -0.133901000 | 2.481904000  | 6          | 0.000315000  | 1.408768000  | 0.000056000  |
| 1                                         | -0.678505000 | -1.735759000 | 2.181030000  | 6          | 1.215891000  | 0.683825000  | 0.000207000  |
| 1                                         | 1.146101000  | -1.652598000 | 2.113232000  | 6          | 1.150417000  | -0.734406000 | 0.000149000  |
| 6                                         | -1.918107000 | 2.096572000  | 0.148236000  | 7          | -0.000322000 | -1.441058000 | -0.000092000 |
| 1                                         | -2.408842000 | 2.906524000  | -0.417626000 | 1          | 0.000524000  | 2.503340000  | 0.000213000  |
| 1                                         | -1.901505000 | 2.381101000  | 1.219093000  | 1          | -2.075339000 | -1.325386000 | -0.000367000 |
| 8                                         | -0.563088000 | 1.929373000  | -0.322651000 | 1          | -2.183366000 | 1.192478000  | -0.000224000 |
| 6                                         | 0.187559000  | 3.168865000  | -0.310363000 | 1          | 2.183921000  | 1.191480000  | 0.000365000  |
| 1                                         | 1.165732000  | 2.953541000  | -0.758511000 | 1          | 2.074742000  | -1.326301000 | 0.000202000  |
| 1                                         | -0.336290000 | 3.924011000  | -0.919956000 |            |              |              |              |
| 1                                         | 0.309061000  | 3.540224000  | 0.723326000  |            |              |              |              |
| 7                                         | -1.981307000 | -0.367537000 | -0.051236000 |            |              |              |              |
| 6                                         | -2.616486000 | -1.559738000 | -0.175542000 |            |              |              |              |
| 6                                         | -2.689004000 | 0.792982000  | -0.038433000 |            |              |              |              |
| 6                                         | -4.021104000 | -1.638929000 | -0.283980000 |            |              |              |              |
| 1                                         | -1.947187000 | -2.424937000 | -0.190364000 |            |              |              |              |
| 6                                         | -4.097427000 | 0.794000000  | -0.156594000 |            |              |              |              |
| 6                                         | -4.774768000 | -0.442217000 | -0.273909000 |            |              |              |              |
| 1                                         | -4.498909000 | -2.615005000 | -0.381866000 |            |              |              |              |
| 1                                         | -4.644182000 | 1.739642000  | -0.156085000 |            |              |              |              |
| 1                                         | -5.863430000 | -0.466863000 | -0.364621000 |            |              |              |              |
| 7                                         | 2.162933000  | -0.166141000 | -0.087261000 |            |              |              |              |
| 6                                         | 2.861271000  | 0.823892000  | 0.528455000  |            |              |              |              |
| 6                                         | 2.835607000  | -1.126884000 | -0.776604000 |            |              |              |              |
| 6                                         | 4.267236000  | 0.912904000  | 0.464551000  |            |              |              |              |
| 6                                         | 4.244161000  | -1.105652000 | -0.897466000 |            |              |              |              |
| 6                                         | 4.973980000  | -0.070445000 | -0.270257000 |            |              |              |              |
| 1                                         | 2.278412000  | 1.549817000  | 1.100506000  |            |              |              |              |
| 1                                         | 2.217148000  | -1.916722000 | -1.203138000 |            |              |              |              |
| 1                                         | 4.782244000  | 1.724314000  | 0.981975000  |            |              |              |              |
| 1                                         | 4.742050000  | -1.891977000 | -1.467457000 |            |              |              |              |
| 1                                         | 6.063996000  | -0.032422000 | -0.343755000 |            |              |              |              |
| 46                                        | 0.089111000  | -0.252127000 | -0.008748000 |            |              |              |              |
| <b>PyO</b>                                |              |              |              | <b>THF</b> |              |              |              |
| 6                                         | 0.291298000  | -1.189525000 | -0.000188000 | 6          | -1.174217000 | -0.433075000 | -0.135694000 |
| 6                                         | -1.116124000 | -1.212065000 | -0.000123000 | 8          | 0.000004000  | -1.265896000 | 0.000000000  |

|                                                    |              |              |              |                                  |              |              |              |
|----------------------------------------------------|--------------|--------------|--------------|----------------------------------|--------------|--------------|--------------|
| 6                                                  | -1.849993000 | 0.000002000  | 0.000094000  | 6                                | 1.174218000  | -0.433069000 | 0.135694000  |
| 6                                                  | -1.116116000 | 1.212068000  | 0.000219000  | 6                                | 0.738482000  | 1.006589000  | -0.234389000 |
| 6                                                  | 0.291303000  | 1.189526000  | 0.000145000  | 6                                | -0.738487000 | 1.006586000  | 0.234388000  |
| 7                                                  | 0.995081000  | -0.000002000 | -0.000042000 | 1                                | -1.535852000 | -0.481407000 | -1.182448000 |
| 1                                                  | -2.942045000 | 0.000007000  | 0.000143000  | 1                                | -1.964554000 | -0.830701000 | 0.524467000  |
| 1                                                  | 0.923470000  | -2.078191000 | -0.000346000 | 1                                | 1.535853000  | -0.481398000 | 1.182449000  |
| 1                                                  | -1.618286000 | -2.182215000 | -0.000239000 | 1                                | 1.964559000  | -0.830692000 | -0.524465000 |
| 1                                                  | -1.618275000 | 2.182219000  | 0.000377000  | 1                                | 1.355573000  | 1.774980000  | 0.258325000  |
| 1                                                  | 0.923481000  | 2.078188000  | 0.000237000  | 1                                | 0.794515000  | 1.159614000  | -1.325777000 |
| 8                                                  | 2.295484000  | -0.000004000 | -0.000096000 | 1                                | -0.794520000 | 1.159609000  | 1.325777000  |
|                                                    |              |              |              | 1                                | -1.355583000 | 1.774974000  | -0.258324000 |
| <b>Methyl Migration – Four Coordinate -Pd</b>      |              |              |              | <b>Pd<sup>II</sup>-methoxide</b> |              |              |              |
| 6                                                  | -2.157315000 | -1.343627000 | 1.482534000  | 6                                | 2.858312000  | 1.004203000  | 0.396487000  |
| 1                                                  | -1.545959000 | -2.217918000 | 1.709122000  | 1                                | 2.851856000  | 1.218447000  | 1.482915000  |
| 1                                                  | -1.970996000 | -0.460066000 | 2.110646000  | 1                                | 3.819938000  | 1.342636000  | -0.023831000 |
| 1                                                  | -3.210158000 | -1.552836000 | 1.294320000  | 8                                | 1.778093000  | 1.722043000  | -0.240765000 |
| 6                                                  | 0.775082000  | 2.084189000  | -0.087360000 | 6                                | 1.854432000  | 3.172372000  | -0.092083000 |
| 1                                                  | 1.153575000  | 2.869102000  | 0.587960000  | 1                                | 0.937463000  | 3.564209000  | -0.546049000 |
| 1                                                  | 0.791090000  | 2.469075000  | -1.125234000 | 1                                | 1.903512000  | 3.439252000  | 0.977393000  |
| 8                                                  | -0.583990000 | 1.745756000  | 0.281393000  | 1                                | 2.750538000  | 3.530892000  | -0.623808000 |
| 6                                                  | -1.524776000 | 2.840915000  | 0.055389000  | 7                                | 1.383754000  | -0.925868000 | -0.027038000 |
| 1                                                  | -2.499083000 | 2.499306000  | 0.426893000  | 6                                | 1.166287000  | -2.245667000 | -0.250012000 |
| 1                                                  | -1.192312000 | 3.721152000  | 0.628193000  | 6                                | 2.662710000  | -0.488730000 | -0.146366000 |
| 1                                                  | -1.582419000 | 3.076566000  | -1.020352000 | 6                                | 2.207820000  | -3.196922000 | -0.280682000 |
| 7                                                  | 0.966232000  | -0.364764000 | -0.114665000 | 1                                | 0.129488000  | -2.542461000 | -0.419622000 |
| 6                                                  | 1.655926000  | -1.536538000 | -0.096635000 | 6                                | 3.766757000  | -1.371723000 | 0.118185000  |
| 6                                                  | 1.620711000  | 0.822545000  | 0.011881000  | 6                                | 3.536059000  | -2.751132000 | -0.087045000 |
| 6                                                  | 3.058096000  | -1.564830000 | 0.047680000  | 1                                | 1.976506000  | -4.247890000 | -0.461387000 |
| 1                                                  | 1.068416000  | -2.449189000 | -0.206656000 | 1                                | 4.779133000  | -0.983467000 | 0.249943000  |
| 6                                                  | 3.023239000  | 0.870726000  | 0.176552000  | 1                                | 4.371626000  | -3.454664000 | -0.110659000 |
| 6                                                  | 3.753169000  | -0.340229000 | 0.189594000  | 7                                | -1.803560000 | -0.429293000 | -0.012888000 |
| 1                                                  | 3.577658000  | -2.524206000 | 0.050661000  | 6                                | -2.771921000 | -0.152770000 | -0.927277000 |
| 1                                                  | 3.524319000  | 1.834861000  | 0.287332000  | 6                                | -2.044601000 | -1.360378000 | 0.948969000  |
| 1                                                  | 4.838704000  | -0.327488000 | 0.312069000  | 6                                | -4.015869000 | -0.823366000 | -0.925949000 |
| 8                                                  | -1.976697000 | -1.835150000 | -0.672351000 | 1                                | -2.538405000 | 0.631874000  | -1.647962000 |
| 46                                                 | -1.096864000 | -0.318886000 | -0.256575000 | 6                                | -3.264438000 | -2.065442000 | 1.028779000  |
|                                                    |              |              |              | 1                                | -1.246629000 | -1.528486000 | 1.675848000  |
|                                                    |              |              |              | 6                                | -4.269134000 | -1.796484000 | 0.068138000  |
|                                                    |              |              |              | 1                                | -4.758798000 | -0.573558000 | -1.685449000 |
|                                                    |              |              |              | 1                                | -3.413717000 | -2.794919000 | 1.826911000  |
|                                                    |              |              |              | 1                                | -5.224606000 | -2.326550000 | 0.098861000  |
|                                                    |              |              |              | 8                                | -1.123164000 | 2.258564000  | -0.353846000 |
|                                                    |              |              |              | 6                                | -1.764566000 | 2.781248000  | 0.804624000  |
|                                                    |              |              |              | 1                                | -1.051886000 | 3.029345000  | 1.619583000  |
|                                                    |              |              |              | 1                                | -2.268093000 | 3.719642000  | 0.500733000  |
|                                                    |              |              |              | 1                                | -2.539662000 | 2.100075000  | 1.212793000  |
|                                                    |              |              |              | 46                               | -0.050221000 | 0.636644000  | -0.103931000 |
| <b>Pd<sup>II</sup>-Methoxide - Four Coordinate</b> |              |              |              |                                  |              |              |              |
|                                                    | 6            | 0.790530000  | 1.916259000  | 0.469893000                      |              |              |              |
|                                                    | 1            | 0.385382000  | 1.796234000  | 1.496960000                      |              |              |              |
|                                                    | 1            | 1.346057000  | 2.873366000  | 0.425009000                      |              |              |              |
|                                                    | 8            | -0.282421000 | 1.909303000  | -0.475457000                     |              |              |              |
|                                                    | 6            | -1.286505000 | 2.881511000  | -0.153685000                     |              |              |              |
|                                                    | 1            | -2.067520000 | 2.795744000  | -0.921725000                     |              |              |              |
|                                                    | 1            | -1.727798000 | 2.681338000  | 0.841864000                      |              |              |              |
|                                                    | 1            | -0.864214000 | 3.906362000  | -0.168598000                     |              |              |              |
|                                                    | 7            | 1.185316000  | -0.486335000 | 0.094297000                      |              |              |              |
|                                                    | 6            | 2.015401000  | -1.540756000 | -0.116759000                     |              |              |              |
|                                                    | 6            | 1.736752000  | 0.759221000  | 0.172504000                      |              |              |              |
|                                                    | 6            | 3.414983000  | -1.414094000 | -0.257361000                     |              |              |              |
|                                                    | 1            | 1.532212000  | -2.519404000 | -0.172489000                     |              |              |              |
|                                                    | 6            | 3.127667000  | 0.978155000  | 0.027949000                      |              |              |              |

## Cobalt – HLL Coordinates

| [(N~O)Co <sup>I</sup> (Me)(THF)] |              |              |              | [(N~O)Co <sup>I</sup> (Me)(PyO)] |              |              |              |
|----------------------------------|--------------|--------------|--------------|----------------------------------|--------------|--------------|--------------|
| 6                                | 0.524854000  | -2.179730000 | -0.484654000 | 6                                | -0.333161000 | -1.645379000 | 1.276718000  |
| 1                                | -0.051915000 | -2.558090000 | -1.356230000 | 1                                | 0.368511000  | -1.886036000 | 2.104181000  |
| 1                                | 1.594085000  | -2.374499000 | -0.729754000 | 1                                | -1.333824000 | -1.539467000 | 1.749383000  |
| 1                                | 0.290336000  | -2.858220000 | 0.369523000  | 1                                | -0.387734000 | -2.558778000 | 0.639027000  |
| 6                                | -1.610432000 | 1.977485000  | -0.260421000 | 6                                | 2.377136000  | 1.896515000  | -0.035410000 |
| 1                                | -1.440054000 | 2.174519000  | -1.339050000 | 1                                | 2.434073000  | 2.257900000  | 1.012285000  |
| 1                                | -2.103459000 | 2.858248000  | 0.191070000  | 1                                | 2.934007000  | 2.598284000  | -0.683666000 |
| 8                                | -0.330557000 | 1.744308000  | 0.366346000  | 8                                | 0.990835000  | 1.843841000  | -0.428587000 |
| 6                                | 0.580612000  | 2.830658000  | 0.146746000  | 6                                | 0.324230000  | 3.102501000  | -0.230959000 |
| 1                                | 1.518450000  | 2.566806000  | 0.650453000  | 1                                | -0.713426000 | 2.963571000  | -0.555117000 |
| 1                                | 0.765973000  | 2.975024000  | -0.935566000 | 1                                | 0.340681000  | 3.389270000  | 0.837583000  |
| 1                                | 0.168382000  | 3.762668000  | 0.577274000  | 1                                | 0.817259000  | 3.885917000  | -0.836899000 |
| 7                                | -1.715028000 | -0.448699000 | -0.106721000 | 7                                | 2.026326000  | -0.504049000 | 0.171924000  |
| 6                                | -2.445277000 | -1.607674000 | -0.003088000 | 6                                | 2.513830000  | -1.788418000 | 0.154011000  |
| 6                                | -2.439963000 | 0.724651000  | -0.074685000 | 6                                | 2.930776000  | 0.489875000  | -0.141967000 |
| 6                                | -3.846825000 | -1.638206000 | 0.127423000  | 6                                | 3.843812000  | -2.113506000 | -0.173740000 |
| 1                                | -1.864756000 | -2.527835000 | -0.027895000 | 1                                | 1.794443000  | -2.562874000 | 0.414055000  |
| 6                                | -3.839258000 | 0.779498000  | 0.079131000  | 6                                | 4.269718000  | 0.245135000  | -0.503715000 |
| 6                                | -4.579480000 | -0.425010000 | 0.174165000  | 6                                | 4.758192000  | -1.085482000 | -0.518192000 |
| 1                                | -4.347980000 | -2.606693000 | 0.200018000  | 1                                | 4.148083000  | -3.163108000 | -0.162435000 |
| 1                                | -4.335775000 | 1.753431000  | 0.115788000  | 1                                | 4.917086000  | 1.088450000  | -0.760638000 |
| 1                                | -5.666072000 | -0.415651000 | 0.286699000  | 1                                | 5.793391000  | -1.306473000 | -0.788320000 |
| 8                                | 2.096569000  | 0.141436000  | 0.132017000  | 8                                | -1.485625000 | 0.820990000  | 0.386740000  |
| 6                                | 2.940421000  | 0.183005000  | -1.060877000 | 7                                | -2.626588000 | 0.216154000  | 0.054576000  |
| 6                                | 2.821946000  | -0.523703000 | 1.225594000  | 6                                | -3.805724000 | 0.782978000  | 0.477970000  |
| 6                                | 4.382203000  | 0.111827000  | -0.518263000 | 6                                | -2.637693000 | -0.923220000 | -0.716448000 |
| 1                                | 2.703423000  | 1.114702000  | -1.596625000 | 6                                | -5.043748000 | 0.219521000  | 0.127466000  |
| 6                                | 4.220309000  | -0.881827000 | 0.660736000  | 1                                | -3.683200000 | 1.674533000  | 1.093799000  |
| 1                                | 2.875743000  | 0.197652000  | 2.058796000  | 6                                | -3.856380000 | -1.519410000 | -1.087619000 |
| 1                                | 5.095102000  | -0.236609000 | -1.281816000 | 1                                | -1.645650000 | -1.286150000 | -0.986550000 |
| 1                                | 5.010155000  | -0.782225000 | 1.421492000  | 6                                | -5.087054000 | -0.954999000 | -0.668147000 |
| 1                                | 2.239672000  | -1.400494000 | 1.535936000  | 1                                | -5.955460000 | 0.701547000  | 0.486273000  |
| 1                                | 4.709075000  | 1.101223000  | -0.155603000 | 1                                | -3.823164000 | -2.421485000 | -1.701834000 |
|                                  |              |              |              |                                  |              |              |              |
|                                  | 6            | 3.988053000  | -0.123555000 | -0.185345000                     |              |              |              |
|                                  | 1            | 4.024256000  | -2.305301000 | -0.421072000                     |              |              |              |
|                                  | 1            | 3.520197000  | 1.996124000  | 0.084127000                      |              |              |              |
|                                  | 1            | 5.065783000  | 0.021958000  | -0.295504000                     |              |              |              |
|                                  | 8            | -2.845708000 | -1.130318000 | 0.125340000                      |              |              |              |
|                                  | 6            | -3.794166000 | -0.192625000 | -0.311348000                     |              |              |              |
|                                  | 1            | -3.822535000 | 0.732753000  | 0.314126000                      |              |              |              |
|                                  | 1            | -3.641149000 | 0.119532000  | -1.372154000                     |              |              |              |
|                                  | 1            | -4.809635000 | -0.644081000 | -0.255484000                     |              |              |              |
|                                  | 46           | -0.916729000 | -0.736236000 | 0.102407000                      |              |              |              |

|                              |             |              |              |              |              |              |              |
|------------------------------|-------------|--------------|--------------|--------------|--------------|--------------|--------------|
| 1                            | 2.696013000 | -0.678481000 | -1.702143000 | 1            | -6.039839000 | -1.411284000 | -0.945613000 |
| 1                            | 4.226055000 | -1.918111000 | 0.286751000  | 27           | 0.247086000  | 0.001338000  | 0.373109000  |
| 27                           | 0.131111000 | -0.303640000 | -0.069623000 |              |              |              |              |
| <b>OAT<sup>2+</sup> - Co</b> |             |              |              |              |              |              |              |
|                              | 6           | 0.296800000  | -1.926718000 | -0.745098000 |              |              |              |
|                              | 1           | -0.337193000 | -2.286678000 | -1.583305000 |              |              |              |
|                              | 1           | 1.341384000  | -1.941893000 | -1.107529000 |              |              |              |
|                              | 1           | 0.221854000  | -2.680654000 | 0.074255000  |              |              |              |
|                              | 6           | -2.288119000 | 1.910920000  | -0.126689000 |              |              |              |
|                              | 1           | -2.103320000 | 2.173049000  | -1.188633000 |              |              |              |
|                              | 1           | -2.918121000 | 2.699480000  | 0.327111000  |              |              |              |
|                              | 8           | -1.035674000 | 1.799734000  | 0.560889000  |              |              |              |
|                              | 6           | -0.229768000 | 2.985496000  | 0.435695000  |              |              |              |
|                              | 1           | 0.696375000  | 2.792994000  | 0.989450000  |              |              |              |
|                              | 1           | 0.018588000  | 3.177588000  | -0.622711000 |              |              |              |
|                              | 1           | -0.772246000 | 3.848312000  | 0.868045000  |              |              |              |
|                              | 7           | -2.128952000 | -0.523402000 | -0.084112000 |              |              |              |
|                              | 6           | -2.700232000 | -1.759997000 | -0.007670000 |              |              |              |
|                              | 6           | -2.971120000 | 0.556328000  | -0.031798000 |              |              |              |
|                              | 6           | -4.090365000 | -1.968490000 | 0.111535000  |              |              |              |
|                              | 1           | -2.008164000 | -2.600145000 | -0.050368000 |              |              |              |
|                              | 6           | -4.371285000 | 0.438444000  | 0.092369000  |              |              |              |
|                              | 6           | -4.955748000 | -0.849808000 | 0.157699000  |              |              |              |
|                              | 1           | -4.474092000 | -2.989668000 | 0.166377000  |              |              |              |
|                              | 1           | -4.985182000 | 1.341549000  | 0.140424000  |              |              |              |
|                              | 1           | -6.037624000 | -0.972007000 | 0.252248000  |              |              |              |
|                              | 8           | 1.226451000  | 0.670341000  | -0.595029000 |              |              |              |
|                              | 7           | 2.746207000  | 0.325042000  | 0.053471000  |              |              |              |
|                              | 6           | 2.938837000  | -0.721021000 | 0.891463000  |              |              |              |
|                              | 6           | 3.776250000  | 0.813213000  | -0.676454000 |              |              |              |
|                              | 6           | 4.207209000  | -1.331724000 | 1.033109000  |              |              |              |
|                              | 1           | 2.051851000  | -1.055516000 | 1.434851000  |              |              |              |
|                              | 6           | 5.075275000  | 0.272959000  | -0.583237000 |              |              |              |
|                              | 1           | 3.522227000  | 1.639722000  | -1.346810000 |              |              |              |
|                              | 6           | 5.299705000  | -0.827423000 | 0.286835000  |              |              |              |
|                              | 1           | 4.323826000  | -2.174292000 | 1.719026000  |              |              |              |
|                              | 1           | 5.883220000  | 0.704737000  | -1.178964000 |              |              |              |
|                              | 1           | 6.292745000  | -1.276665000 | 0.374326000  |              |              |              |
|                              | 27          | -0.240288000 | -0.160188000 | -0.140990000 |              |              |              |

| <b>[N~O)Co<sup>III</sup>(O)(Me)]</b> |              |              |              | <b>[(N~O)Co<sup>III</sup>(Py)(O)(Me)]</b> |              |              |              |
|--------------------------------------|--------------|--------------|--------------|-------------------------------------------|--------------|--------------|--------------|
| 6                                    | -0.873414000 | -2.852562000 | 0.044654000  | 8                                         | 0.147205000  | -2.089149000 | -0.113769000 |
| 1                                    | -0.145685000 | -3.113693000 | 0.833390000  | 6                                         | 0.037202000  | 0.169283000  | 2.026893000  |
| 1                                    | -1.840828000 | -3.328280000 | 0.266247000  | 1                                         | 0.207172000  | 1.263334000  | 2.136090000  |
| 1                                    | -0.508811000 | -3.231637000 | -0.936967000 | 1                                         | -0.930665000 | -0.069035000 | 2.504100000  |
| 6                                    | -0.215526000 | 1.855283000  | 0.528467000  | 1                                         | 0.830870000  | -0.354983000 | 2.587497000  |
| 1                                    | -0.833827000 | 1.427473000  | 1.338594000  | 6                                         | -1.740767000 | 2.008079000  | -0.119405000 |
| 1                                    | 0.142019000  | 2.858549000  | 0.833683000  | 1                                         | -2.221383000 | 2.787234000  | -0.740558000 |
| 8                                    | -0.967756000 | 1.931489000  | -0.685258000 | 1                                         | -1.666186000 | 2.387417000  | 0.919361000  |
| 6                                    | -2.285218000 | 2.466631000  | -0.461236000 | 8                                         | -0.428854000 | 1.714401000  | -0.618267000 |
| 1                                    | -2.769750000 | 2.522672000  | -1.447320000 | 6                                         | 0.405950000  | 2.879018000  | -0.664107000 |
| 1                                    | -2.855747000 | 1.792463000  | 0.201242000  | 1                                         | 1.364201000  | 2.569042000  | -1.100850000 |
| 1                                    | -2.227406000 | 3.484472000  | -0.025288000 | 1                                         | -0.054754000 | 3.656123000  | -1.302903000 |
| 7                                    | 0.730364000  | -0.357213000 | -0.053770000 | 1                                         | 0.571302000  | 3.292332000  | 0.349784000  |
| 6                                    | 1.780597000  | -1.178026000 | -0.312736000 | 7                                         | -1.882559000 | -0.432559000 | -0.010526000 |
| 6                                    | 0.982698000  | 0.948679000  | 0.271425000  | 6                                         | -2.563203000 | -1.604380000 | 0.011566000  |
| 6                                    | 3.125910000  | -0.753244000 | -0.260926000 | 6                                         | -2.566208000 | 0.727916000  | -0.148500000 |
| 1                                    | 1.530709000  | -2.209858000 | -0.560496000 | 6                                         | -3.970576000 | -1.655918000 | -0.095650000 |
| 6                                    | 2.303816000  | 1.444815000  | 0.354796000  | 1                                         | -1.897118000 | -2.471352000 | 0.099458000  |
| 6                                    | 3.396643000  | 0.587430000  | 0.088893000  | 6                                         | -3.974011000 | 0.767178000  | -0.288245000 |

|                                          |              |              |              |            |              |              |              |
|------------------------------------------|--------------|--------------|--------------|------------|--------------|--------------|--------------|
| 1                                        | 3.924003000  | -1.464049000 | -0.482864000 | 6          | -4.693275000 | -0.449042000 | -0.251428000 |
| 1                                        | 2.461383000  | 2.493980000  | 0.612363000  | 1          | -4.478326000 | -2.622269000 | -0.063361000 |
| 1                                        | 4.423345000  | 0.958208000  | 0.146171000  | 1          | -4.483475000 | 1.725265000  | -0.420542000 |
| 8                                        | -2.246719000 | -0.528073000 | 0.915889000  | 1          | -5.782596000 | -0.453233000 | -0.347805000 |
| 27                                       | -1.110711000 | -0.964118000 | -0.139535000 | 7          | 2.058635000  | -0.307428000 | 0.018433000  |
|                                          |              |              |              | 6          | 2.798273000  | 0.682135000  | 0.576391000  |
|                                          |              |              |              | 6          | 2.709909000  | -1.275417000 | -0.680206000 |
|                                          |              |              |              | 6          | 4.203484000  | 0.772324000  | 0.448358000  |
|                                          |              |              |              | 6          | 4.112870000  | -1.267531000 | -0.864107000 |
|                                          |              |              |              | 6          | 4.879005000  | -0.223463000 | -0.295703000 |
|                                          |              |              |              | 1          | 2.246948000  | 1.417042000  | 1.165406000  |
|                                          |              |              |              | 1          | 2.047111000  | -2.064464000 | -1.044868000 |
|                                          |              |              |              | 1          | 4.739952000  | 1.592955000  | 0.930075000  |
|                                          |              |              |              | 1          | 4.581254000  | -2.069338000 | -1.439385000 |
|                                          |              |              |              | 1          | 5.965492000  | -0.189639000 | -0.421164000 |
|                                          |              |              |              | 27         | 0.079590000  | -0.422209000 | 0.150202000  |
| <b>Methyl Migration<sup>‡</sup> - Pd</b> |              |              |              | <b>Py</b>  |              |              |              |
| 8                                        | 0.201107000  | -2.046467000 | 0.140962000  | 6          | -1.150745000 | -0.733908000 | -0.000217000 |
| 6                                        | 0.183822000  | -1.215723000 | 1.888020000  | 6          | -1.215583000 | 0.684354000  | -0.000119000 |
| 1                                        | 0.107381000  | -0.199557000 | 2.357643000  | 6          | 0.000315000  | 1.408768000  | 0.000056000  |
| 1                                        | -0.661891000 | -1.820880000 | 2.235118000  | 6          | 1.215891000  | 0.683825000  | 0.000207000  |
| 1                                        | 1.141327000  | -1.666629000 | 2.170788000  | 6          | 1.150417000  | -0.734406000 | 0.000149000  |
| 6                                        | -1.725851000 | 2.049001000  | 0.188411000  | 7          | -0.000322000 | -1.441058000 | -0.000092000 |
| 1                                        | -2.171935000 | 2.923293000  | -0.320581000 | 1          | 0.000524000  | 2.503340000  | 0.000213000  |
| 1                                        | -1.645516000 | 2.276058000  | 1.272588000  | 1          | -2.075339000 | -1.325386000 | -0.000367000 |
| 8                                        | -0.411421000 | 1.787454000  | -0.334951000 | 1          | -2.183366000 | 1.192478000  | -0.000224000 |
| 6                                        | 0.426147000  | 2.951762000  | -0.316600000 | 1          | 2.183921000  | 1.191480000  | 0.000365000  |
| 1                                        | 1.375173000  | 2.673561000  | -0.791039000 | 1          | 2.074742000  | -1.326301000 | 0.000202000  |
| 1                                        | -0.049923000 | 3.767096000  | -0.892137000 |            |              |              |              |
| 1                                        | 0.609405000  | 3.293963000  | 0.720856000  |            |              |              |              |
| 7                                        | -1.863781000 | -0.359713000 | -0.082690000 |            |              |              |              |
| 6                                        | -2.547866000 | -1.527883000 | -0.216959000 |            |              |              |              |
| 6                                        | -2.567386000 | 0.802257000  | -0.035290000 |            |              |              |              |
| 6                                        | -3.954823000 | -1.569213000 | -0.320087000 |            |              |              |              |
| 1                                        | -1.888810000 | -2.402317000 | -0.226309000 |            |              |              |              |
| 6                                        | -3.973990000 | 0.855412000  | -0.153448000 |            |              |              |              |
| 6                                        | -4.688716000 | -0.357734000 | -0.295297000 |            |              |              |              |
| 1                                        | -4.456953000 | -2.533650000 | -0.425036000 |            |              |              |              |
| 1                                        | -4.489580000 | 1.819348000  | -0.129162000 |            |              |              |              |
| 1                                        | -5.778096000 | -0.355112000 | -0.387694000 |            |              |              |              |
| 7                                        | 1.995053000  | -0.153357000 | -0.111803000 |            |              |              |              |
| 6                                        | 2.752978000  | 0.700075000  | 0.623431000  |            |              |              |              |
| 6                                        | 2.642612000  | -1.048812000 | -0.909406000 |            |              |              |              |
| 6                                        | 4.164013000  | 0.742819000  | 0.566092000  |            |              |              |              |
| 6                                        | 4.051735000  | -1.076911000 | -1.037790000 |            |              |              |              |
| 6                                        | 4.832598000  | -0.161409000 | -0.294639000 |            |              |              |              |
| 1                                        | 2.204063000  | 1.355034000  | 1.305297000  |            |              |              |              |
| 1                                        | 1.990756000  | -1.751340000 | -1.426560000 |            |              |              |              |
| 1                                        | 4.711328000  | 1.452939000  | 1.190456000  |            |              |              |              |
| 1                                        | 4.513760000  | -1.809647000 | -1.703322000 |            |              |              |              |
| 1                                        | 5.923882000  | -0.160040000 | -0.371806000 |            |              |              |              |
| 27                                       | 0.065096000  | -0.298532000 | 0.007987000  |            |              |              |              |
| <b>PyO</b>                               |              |              |              | <b>THF</b> |              |              |              |
| 6                                        | 0.291298000  | -1.189525000 | -0.000188000 | 6          | -1.174217000 | -0.433075000 | -0.135694000 |
| 6                                        | -1.116124000 | -1.212065000 | -0.000123000 | 8          | 0.000004000  | -1.265896000 | 0.000000000  |
| 6                                        | -1.849993000 | 0.000002000  | 0.000094000  | 6          | 1.174218000  | -0.433069000 | 0.135694000  |
| 6                                        | -1.116116000 | 1.212068000  | 0.000219000  | 6          | 0.738482000  | 1.006589000  | -0.234389000 |
| 6                                        | 0.291303000  | 1.189526000  | 0.000145000  | 6          | -0.738487000 | 1.006586000  | 0.234388000  |
| 7                                        | 0.995081000  | -0.000002000 | -0.000042000 | 1          | -1.535852000 | -0.481407000 | -1.182448000 |
| 1                                        | -2.942045000 | 0.000007000  | 0.000143000  | 1          | -1.964554000 | -0.830701000 | 0.524467000  |
| 1                                        | 0.923470000  | -2.078191000 | -0.000346000 | 1          | 1.535853000  | -0.481398000 | 1.182449000  |
| 1                                        | -1.618286000 | -2.182215000 | -0.000239000 | 1          | 1.964559000  | -0.830692000 | -0.524465000 |

|                                                   |              |              |              |                                 |              |              |              |
|---------------------------------------------------|--------------|--------------|--------------|---------------------------------|--------------|--------------|--------------|
| 1                                                 | -1.618275000 | 2.182219000  | 0.000377000  | 1                               | 1.355573000  | 1.774980000  | 0.258325000  |
| 1                                                 | 0.923481000  | 2.078188000  | 0.000237000  | 1                               | 0.794515000  | 1.159614000  | -1.325777000 |
| 8                                                 | 2.295484000  | -0.000004000 | -0.000096000 | 1                               | -0.794520000 | 1.159609000  | 1.325777000  |
|                                                   |              |              |              | 1                               | -1.355583000 | 1.774974000  | -0.258324000 |
| <b>Methyl migration – Four Coordinate Co</b>      |              |              |              | <b>Co<sup>I</sup>-Methoxide</b> |              |              |              |
| 6                                                 | -2.193350000 | -1.605219000 | 1.166563000  | 6                               | 2.811333000  | 0.997556000  | 0.445995000  |
| 1                                                 | -1.712157000 | -2.576834000 | 1.329243000  | 1                               | 2.762166000  | 1.179874000  | 1.540121000  |
| 1                                                 | -1.855593000 | -0.880172000 | 1.938516000  | 1                               | 3.807345000  | 1.307728000  | 0.080108000  |
| 1                                                 | -3.285506000 | -1.684270000 | 1.196351000  | 8                               | 1.778048000  | 1.762623000  | -0.196855000 |
| 6                                                 | 0.389644000  | 2.018139000  | -0.113895000 | 6                               | 1.888799000  | 3.183124000  | 0.047669000  |
| 1                                                 | 0.702479000  | 2.878202000  | 0.504328000  | 1                               | 0.982204000  | 3.626536000  | -0.376660000 |
| 1                                                 | 0.301228000  | 2.343695000  | -1.170560000 | 1                               | 1.923543000  | 3.381956000  | 1.134790000  |
| 8                                                 | -0.894634000 | 1.522752000  | 0.327561000  | 1                               | 2.809311000  | 3.556321000  | -0.438347000 |
| 6                                                 | -1.982251000 | 2.426996000  | 0.036246000  | 7                               | 1.195963000  | -0.749249000 | -0.043420000 |
| 1                                                 | -2.891385000 | 1.959646000  | 0.435569000  | 6                               | 0.901898000  | -2.069592000 | -0.293433000 |
| 1                                                 | -1.802572000 | 3.396963000  | 0.533800000  | 6                               | 2.534432000  | -0.458451000 | -0.129850000 |
| 1                                                 | -2.083996000 | 2.567393000  | -1.054736000 | 6                               | 1.867012000  | -3.091776000 | -0.357436000 |
| 7                                                 | 0.748237000  | -0.367653000 | -0.158860000 | 1                               | -0.150578000 | -2.298332000 | -0.461569000 |
| 6                                                 | 1.545488000  | -1.477230000 | -0.152628000 | 6                               | 3.562515000  | -1.417055000 | 0.053395000  |
| 6                                                 | 1.354988000  | 0.851708000  | -0.005767000 | 6                               | 3.238653000  | -2.777302000 | -0.181080000 |
| 6                                                 | 2.944223000  | -1.411827000 | 0.007330000  | 1                               | 1.539481000  | -4.114825000 | -0.558580000 |
| 1                                                 | 1.023719000  | -2.426618000 | -0.288286000 | 1                               | 4.600386000  | -1.097780000 | 0.184156000  |
| 6                                                 | 2.743223000  | 1.003380000  | 0.182141000  | 1                               | 4.014250000  | -3.544319000 | -0.236818000 |
| 6                                                 | 3.565911000  | -0.150418000 | 0.184196000  | 7                               | -1.594438000 | -0.264135000 | 0.018688000  |
| 1                                                 | 3.525995000  | -2.336010000 | -0.002030000 | 6                               | -2.484813000 | -0.214454000 | -1.009677000 |
| 1                                                 | 3.167471000  | 2.002069000  | 0.315720000  | 6                               | -1.932197000 | -1.001844000 | 1.111371000  |
| 1                                                 | 4.646689000  | -0.067347000 | 0.320429000  | 6                               | -3.720059000 | -0.899727000 | -0.994804000 |
| 8                                                 | -2.198815000 | -1.624584000 | -0.718928000 | 1                               | -2.182568000 | 0.400426000  | -1.858989000 |
| 27                                                | -1.127174000 | -0.434136000 | -0.282981000 | 6                               | -3.148685000 | -1.712992000 | 1.220045000  |
|                                                   |              |              |              | 1                               | -1.194922000 | -1.011188000 | 1.917323000  |
|                                                   |              |              |              | 6                               | -4.065394000 | -1.666598000 | 0.143217000  |
|                                                   |              |              |              | 1                               | -4.387549000 | -0.822842000 | -1.856001000 |
|                                                   |              |              |              | 1                               | -3.360938000 | -2.281523000 | 2.128300000  |
|                                                   |              |              |              | 1                               | -5.015810000 | -2.205821000 | 0.190342000  |
|                                                   |              |              |              | 8                               | -0.817126000 | 2.378044000  | -0.162635000 |
|                                                   |              |              |              | 6                               | -2.136610000 | 2.724066000  | 0.157089000  |
|                                                   |              |              |              | 1                               | -2.529215000 | 2.202831000  | 1.061762000  |
|                                                   |              |              |              | 1                               | -2.203633000 | 3.815831000  | 0.364653000  |
|                                                   |              |              |              | 1                               | -2.864680000 | 2.523875000  | -0.667093000 |
|                                                   |              |              |              | 27                              | 0.024143000  | 0.732588000  | -0.071543000 |
| <b>Co<sup>I</sup>-Methoxide - Four Coordinate</b> |              |              |              |                                 |              |              |              |
|                                                   | 6            | -0.901287000 | 2.006152000  | -0.100936000                    |              |              |              |
|                                                   | 1            | -0.900847000 | 2.359023000  | -1.151617000                    |              |              |              |
|                                                   | 1            | -1.422775000 | 2.750523000  | 0.526907000                     |              |              |              |
|                                                   | 8            | 0.470040000  | 1.860136000  | 0.339768000                     |              |              |              |
|                                                   | 6            | 1.287247000  | 3.009814000  | 0.037149000                     |              |              |              |
|                                                   | 1            | 2.284103000  | 2.801180000  | 0.447983000                     |              |              |              |
|                                                   | 1            | 1.355184000  | 3.160822000  | -1.055534000                    |              |              |              |
|                                                   | 1            | 0.861380000  | 3.907617000  | 0.520252000                     |              |              |              |
|                                                   | 7            | -0.628701000 | -0.397246000 | -0.096256000                    |              |              |              |
|                                                   | 6            | -1.123971000 | -1.674676000 | -0.110194000                    |              |              |              |
|                                                   | 6            | -1.535969000 | 0.630182000  | -0.006027000                    |              |              |              |
|                                                   | 6            | -2.499796000 | -1.962104000 | -0.023686000                    |              |              |              |
|                                                   | 1            | -0.373344000 | -2.462387000 | -0.197343000                    |              |              |              |
|                                                   | 6            | -2.925076000 | 0.425062000  | 0.109182000                     |              |              |              |
|                                                   | 6            | -3.430694000 | -0.898502000 | 0.096872000                     |              |              |              |
|                                                   | 1            | -2.827211000 | -3.003968000 | -0.043951000                    |              |              |              |
|                                                   | 1            | -3.594030000 | 1.285676000  | 0.196934000                     |              |              |              |
|                                                   | 1            | -4.502945000 | -1.090617000 | 0.178426000                     |              |              |              |
|                                                   | 8            | 2.378288000  | -1.231718000 | -0.441269000                    |              |              |              |
|                                                   | 6            | 2.856763000  | -2.261931000 | 0.401419000                     |              |              |              |
|                                                   | 1            | 2.807399000  | -2.021249000 | 1.485197000                     |              |              |              |

## Rhodium – HLL Coordinates

| [(N~O)Rh <sup>I</sup> (Me)(THF)] |              |              |              | [(N~O)Rh <sup>I</sup> (Me)(PyO)] |              |              |              |
|----------------------------------|--------------|--------------|--------------|----------------------------------|--------------|--------------|--------------|
| 6                                | 0.536999000  | -2.215732000 | -0.545084000 | 6                                | 0.496503000  | -1.734589000 | -1.266871000 |
| 1                                | -0.089378000 | -2.569364000 | -1.389848000 | 1                                | -0.300283000 | -2.453113000 | -1.543971000 |
| 1                                | 1.595318000  | -2.366762000 | -0.851527000 | 1                                | 1.035730000  | -1.501275000 | -2.211114000 |
| 1                                | 0.354886000  | -2.891841000 | 0.320584000  | 1                                | 1.202588000  | -2.261081000 | -0.584767000 |
| 6                                | -1.785861000 | 1.983817000  | -0.337352000 | 6                                | -2.579032000 | 1.749768000  | -0.214844000 |
| 1                                | -1.505660000 | 2.062068000  | -1.407388000 | 1                                | -2.544428000 | 1.861427000  | -1.317484000 |
| 1                                | -2.385926000 | 2.868950000  | -0.053350000 | 1                                | -3.293407000 | 2.485229000  | 0.201049000  |
| 8                                | -0.577455000 | 1.927524000  | 0.448760000  | 8                                | -1.256735000 | 1.987914000  | 0.313060000  |
| 6                                | 0.296154000  | 3.031263000  | 0.177844000  | 6                                | -0.703314000 | 3.228525000  | -0.153262000 |
| 1                                | 1.193001000  | 2.881503000  | 0.794287000  | 1                                | 0.314243000  | 3.291588000  | 0.254188000  |
| 1                                | 0.581714000  | 3.052910000  | -0.891655000 | 1                                | -0.651893000 | 3.239834000  | -1.258075000 |
| 1                                | -0.191108000 | 3.987759000  | 0.451116000  | 1                                | -1.312546000 | 4.081440000  | 0.205085000  |
| 7                                | -1.841764000 | -0.457183000 | -0.098484000 | 7                                | -2.042499000 | -0.638072000 | -0.055674000 |
| 6                                | -2.538813000 | -1.625402000 | 0.049618000  | 6                                | -2.409063000 | -1.925788000 | 0.232357000  |
| 6                                | -2.576936000 | 0.707636000  | -0.109506000 | 6                                | -2.998802000 | 0.335516000  | 0.144648000  |
| 6                                | -3.940983000 | -1.682315000 | 0.186422000  | 6                                | -3.688854000 | -2.285512000 | 0.703267000  |
| 1                                | -1.935214000 | -2.532345000 | 0.056182000  | 1                                | -1.636725000 | -2.678479000 | 0.077564000  |
| 6                                | -3.979054000 | 0.732993000  | 0.043845000  | 6                                | -4.292350000 | 0.055839000  | 0.631535000  |
| 6                                | -4.691895000 | -0.482434000 | 0.186866000  | 6                                | -4.665342000 | -1.282204000 | 0.911100000  |
| 1                                | -4.423065000 | -2.656514000 | 0.298122000  | 1                                | -3.901076000 | -3.338090000 | 0.906464000  |
| 1                                | -4.498859000 | 1.694799000  | 0.045755000  | 1                                | -4.994294000 | 0.880159000  | 0.783411000  |
| 1                                | -5.778534000 | -0.489416000 | 0.301028000  | 1                                | -5.664250000 | -1.525013000 | 1.281351000  |
| 8                                | 2.284337000  | 0.138450000  | 0.142313000  | 8                                | 1.683708000  | 1.002971000  | -0.481437000 |
| 6                                | 3.111879000  | 0.214026000  | -1.054405000 | 7                                | 2.767630000  | 0.359614000  | -0.027685000 |
| 6                                | 3.027449000  | -0.551682000 | 1.203335000  | 6                                | 3.219160000  | 0.625833000  | 1.241802000  |
| 6                                | 4.553776000  | 0.263021000  | -0.510400000 | 6                                | 3.464274000  | -0.492434000 | -0.847763000 |
| 1                                | 2.798057000  | 1.111232000  | -1.607747000 | 6                                | 4.396706000  | 0.034886000  | 1.729172000  |
| 6                                | 4.473686000  | -0.744848000 | 0.666698000  | 1                                | 2.584598000  | 1.303620000  | 1.813064000  |
| 1                                | 2.981706000  | 0.098197000  | 2.092417000  | 6                                | 4.644297000  | -1.116069000 | -0.399163000 |
| 1                                | 5.297532000  | -0.022260000 | -1.271079000 | 1                                | 3.031917000  | -0.628394000 | -1.836563000 |
| 1                                | 5.231214000  | -0.558522000 | 1.443772000  | 6                                | 5.130705000  | -0.858415000 | 0.905368000  |
| 1                                | 2.519315000  | -1.500838000 | 1.422630000  | 1                                | 4.719607000  | 0.272438000  | 2.744785000  |
| 1                                | 4.791012000  | 1.276607000  | -0.145870000 | 1                                | 5.165628000  | -1.791528000 | -1.080348000 |
| 1                                | 2.935394000  | -0.677502000 | -1.679942000 | 1                                | 6.044928000  | -1.333628000 | 1.268119000  |
| 1                                | 4.608885000  | -1.773060000 | 0.293808000  | 45                               | -0.186252000 | 0.002330000  | -0.432807000 |
| 45                               | 0.138636000  | -0.269004000 | -0.044617000 |                                  |              |              |              |
| OAT <sup>z</sup> - Rh            |              |              |              |                                  |              |              |              |
|                                  | 6            | 0.344007000  | -1.892442000 | -1.087068000                     |              |              |              |
|                                  | 1            | -0.360108000 | -2.172893000 | -1.894995000                     |              |              |              |
|                                  | 1            | 1.354235000  | -1.802835000 | -1.526349000                     |              |              |              |
|                                  | 1            | 2.285647000  | -3.205248000 | 0.238639000                      |              |              |              |
|                                  | 1            | 3.917005000  | -2.482566000 | 0.154702000                      |              |              |              |
|                                  | 27           | 1.161534000  | 0.004096000  | -0.082869000                     |              |              |              |

|    |              |              |              |
|----|--------------|--------------|--------------|
| 1  | 0.365825000  | -2.715334000 | -0.338715000 |
| 6  | -2.479524000 | 1.898074000  | -0.126668000 |
| 1  | -2.266020000 | 2.089730000  | -1.198269000 |
| 1  | -3.181613000 | 2.671497000  | 0.239359000  |
| 8  | -1.251181000 | 1.942625000  | 0.614963000  |
| 6  | -0.517105000 | 3.156148000  | 0.383690000  |
| 1  | 0.419513000  | 3.064432000  | 0.948067000  |
| 1  | -0.279897000 | 3.270374000  | -0.689583000 |
| 1  | -1.099844000 | 4.028165000  | 0.740391000  |
| 7  | -2.228214000 | -0.544768000 | -0.069977000 |
| 6  | -2.749663000 | -1.799159000 | 0.051548000  |
| 6  | -3.093497000 | 0.514290000  | 0.032765000  |
| 6  | -4.119981000 | -2.050901000 | 0.275456000  |
| 1  | -2.033344000 | -2.616524000 | -0.042364000 |
| 6  | -4.476362000 | 0.346800000  | 0.257607000  |
| 6  | -5.013263000 | -0.958630000 | 0.377074000  |
| 1  | -4.466845000 | -3.083010000 | 0.362806000  |
| 1  | -5.115517000 | 1.229218000  | 0.342510000  |
| 1  | -6.081173000 | -1.112684000 | 0.550515000  |
| 8  | 1.355031000  | 0.808615000  | -0.572013000 |
| 7  | 3.002834000  | 0.237943000  | -0.033295000 |
| 6  | 3.129019000  | -0.787079000 | 0.824084000  |
| 6  | 4.075151000  | 0.796228000  | -0.616676000 |
| 6  | 4.400258000  | -1.317467000 | 1.156981000  |
| 1  | 2.185780000  | -1.169655000 | 1.231191000  |
| 6  | 5.386979000  | 0.338958000  | -0.342732000 |
| 1  | 3.866583000  | 1.615065000  | -1.313484000 |
| 6  | 5.548712000  | -0.741111000 | 0.561436000  |
| 1  | 4.477217000  | -2.153273000 | 1.856266000  |
| 1  | 6.244060000  | 0.811874000  | -0.828103000 |
| 1  | 6.546456000  | -1.125383000 | 0.793118000  |
| 45 | -0.209708000 | -0.126959000 | -0.207512000 |

| [N~O)Rh <sup>III</sup> (O)(Me)] |              |              |              | [(N~O)Rh <sup>III</sup> (Py)(O)(Me)] |              |              |              |
|---------------------------------|--------------|--------------|--------------|--------------------------------------|--------------|--------------|--------------|
| 6                               | -1.344727000 | -2.266707000 | 1.069024000  | 8                                    | 0.266636000  | -2.149772000 | -0.140355000 |
| 1                               | -0.720879000 | -2.089977000 | 1.961408000  | 6                                    | 0.137545000  | 0.496095000  | 1.959987000  |
| 1                               | -2.390638000 | -2.454063000 | 1.359379000  | 1                                    | 0.308846000  | 1.593170000  | 1.926562000  |
| 1                               | -0.963872000 | -3.152262000 | 0.516267000  | 1                                    | -0.817437000 | 0.304538000  | 2.481171000  |
| 6                               | 0.500613000  | 1.815182000  | 0.767437000  | 1                                    | 0.952653000  | 0.035692000  | 2.543335000  |
| 1                               | -0.441920000 | 1.458250000  | 1.219671000  | 6                                    | -2.069457000 | 2.004024000  | -0.011308000 |
| 1                               | 1.040016000  | 2.443287000  | 1.505684000  | 1                                    | -2.710373000 | 2.760892000  | -0.502426000 |
| 8                               | 0.243475000  | 2.558795000  | -0.427878000 | 1                                    | -1.943704000 | 2.296644000  | 1.050576000  |
| 6                               | -0.845168000 | 3.482179000  | -0.257662000 | 8                                    | -0.788364000 | 1.950221000  | -0.648440000 |
| 1                               | -0.956221000 | 4.011990000  | -1.215718000 | 6                                    | -0.118020000 | 3.215228000  | -0.624731000 |
| 1                               | -1.775800000 | 2.937965000  | -0.018673000 | 1                                    | 0.827912000  | 3.081471000  | -1.168520000 |
| 1                               | -0.620209000 | 4.219809000  | 0.540419000  | 1                                    | -0.725236000 | 3.989328000  | -1.133086000 |
| 7                               | 0.777847000  | -0.487939000 | -0.126937000 | 1                                    | 0.088659000  | 3.542585000  | 0.413461000  |
| 6                               | 1.561094000  | -1.522478000 | -0.542268000 | 7                                    | -1.957509000 | -0.466001000 | -0.016288000 |
| 6                               | 1.377582000  | 0.632193000  | 0.379430000  | 6                                    | -2.532185000 | -1.696250000 | -0.024958000 |
| 6                               | 2.967559000  | -1.500571000 | -0.473278000 | 6                                    | -2.746185000 | 0.636841000  | -0.087876000 |
| 1                               | 1.036707000  | -2.393196000 | -0.944295000 | 6                                    | -3.931285000 | -1.872118000 | -0.098746000 |
| 6                               | 2.787203000  | 0.719104000  | 0.484395000  | 1                                    | -1.795459000 | -2.509016000 | 0.017169000  |
| 6                               | 3.601322000  | -0.352163000 | 0.056699000  | 6                                    | -4.155165000 | 0.545205000  | -0.188688000 |
| 1                               | 3.535876000  | -2.363649000 | -0.825144000 | 6                                    | -4.763011000 | -0.731174000 | -0.184893000 |
| 1                               | 3.225199000  | 1.633474000  | 0.889524000  | 1                                    | -4.347114000 | -2.881969000 | -0.094349000 |
| 1                               | 4.690095000  | -0.292803000 | 0.129652000  | 1                                    | -4.753788000 | 1.456484000  | -0.265945000 |
| 8                               | -2.442601000 | 0.545884000  | 0.112292000  | 1                                    | -5.849927000 | -0.829363000 | -0.253621000 |
| 45                              | -1.269848000 | -0.698247000 | -0.235724000 | 7                                    | 2.238272000  | -0.231878000 | -0.036599000 |
|                                 |              |              |              | 6                                    | 2.943075000  | 0.890368000  | 0.252944000  |
|                                 |              |              |              | 6                                    | 2.925655000  | -1.343560000 | -0.412807000 |
|                                 |              |              |              | 6                                    | 4.351296000  | 0.968124000  | 0.164268000  |

|                                          |              |              |              |              |              |              |              |
|------------------------------------------|--------------|--------------|--------------|--------------|--------------|--------------|--------------|
|                                          | 6            | 4.335581000  | -1.359408000 | -0.525711000 |              |              |              |
|                                          | 6            | 5.067880000  | -0.183643000 | -0.238785000 |              |              |              |
|                                          | 1            | 2.357972000  | 1.756283000  | 0.572535000  |              |              |              |
|                                          | 1            | 2.275199000  | -2.208759000 | -0.588939000 |              |              |              |
|                                          | 1            | 4.858284000  | 1.903938000  | 0.410362000  |              |              |              |
|                                          | 1            | 4.836255000  | -2.280278000 | -0.833587000 |              |              |              |
|                                          | 1            | 6.158674000  | -0.164576000 | -0.322702000 |              |              |              |
|                                          | 45           | 0.129172000  | -0.328531000 | 0.056809000  |              |              |              |
| <b>Methyl Migration<sup>‡</sup> - Rh</b> |              |              |              |              | <b>Py</b>    |              |              |
| 8                                        | 0.267835000  | -2.129918000 | 0.102949000  | 6            | -1.150745000 | -0.733908000 | -0.000217000 |
| 6                                        | 0.254242000  | -1.342832000 | 1.909066000  | 6            | -1.215583000 | 0.684354000  | -0.000119000 |
| 1                                        | 0.205732000  | -0.367238000 | 2.451786000  | 6            | 0.000315000  | 1.408768000  | 0.000056000  |
| 1                                        | -0.601636000 | -1.963486000 | 2.194518000  | 6            | 1.215891000  | 0.683825000  | 0.000207000  |
| 1                                        | 1.207743000  | -1.835659000 | 2.120733000  | 6            | 1.150417000  | -0.734406000 | 0.000149000  |
| 6                                        | -1.952047000 | 2.062986000  | 0.244629000  | 7            | -0.000322000 | -1.441058000 | -0.000092000 |
| 1                                        | -2.517050000 | 2.928946000  | -0.148020000 | 1            | 0.000524000  | 2.503340000  | 0.000213000  |
| 1                                        | -1.815053000 | 2.194900000  | 1.338302000  | 1            | -2.075339000 | -1.325386000 | -0.000367000 |
| 8                                        | -0.655909000 | 1.995395000  | -0.379891000 | 1            | -2.183366000 | 1.192478000  | -0.000224000 |
| 6                                        | 0.109343000  | 3.187866000  | -0.158225000 | 1            | 2.183921000  | 1.191480000  | 0.000365000  |
| 1                                        | 1.051215000  | 3.067754000  | -0.710045000 | 1            | 2.074742000  | -1.326301000 | 0.000202000  |
| 1                                        | -0.433953000 | 4.071459000  | -0.544296000 |              |              |              |              |
| 1                                        | 0.318521000  | 3.326172000  | 0.920842000  |              |              |              |              |
| 7                                        | -1.955557000 | -0.364315000 | -0.064830000 |              |              |              |              |
| 6                                        | -2.574319000 | -1.564752000 | -0.223604000 |              |              |              |              |
| 6                                        | -2.708816000 | 0.768937000  | -0.024122000 |              |              |              |              |
| 6                                        | -3.976332000 | -1.673230000 | -0.352843000 |              |              |              |              |
| 1                                        | -1.873462000 | -2.407446000 | -0.237223000 |              |              |              |              |
| 6                                        | -4.113815000 | 0.747791000  | -0.171548000 |              |              |              |              |
| 6                                        | -4.765633000 | -0.498540000 | -0.333026000 |              |              |              |              |
| 1                                        | -4.429136000 | -2.659608000 | -0.475961000 |              |              |              |              |
| 1                                        | -4.678218000 | 1.683776000  | -0.153437000 |              |              |              |              |
| 1                                        | -5.852020000 | -0.547288000 | -0.445323000 |              |              |              |              |
| 7                                        | 2.158586000  | -0.104270000 | -0.103448000 |              |              |              |              |
| 6                                        | 2.906934000  | 0.895960000  | 0.430658000  |              |              |              |              |
| 6                                        | 2.812383000  | -1.127692000 | -0.724427000 |              |              |              |              |
| 6                                        | 4.315419000  | 0.949058000  | 0.343327000  |              |              |              |              |
| 6                                        | 4.221050000  | -1.155050000 | -0.864160000 |              |              |              |              |
| 6                                        | 4.992199000  | -0.098085000 | -0.329360000 |              |              |              |              |
| 1                                        | 2.350844000  | 1.673678000  | 0.960565000  |              |              |              |              |
| 1                                        | 2.159152000  | -1.928680000 | -1.073492000 |              |              |              |              |
| 1                                        | 4.854982000  | 1.783588000  | 0.797231000  |              |              |              |              |
| 1                                        | 4.689116000  | -1.995810000 | -1.381341000 |              |              |              |              |
| 1                                        | 6.082050000  | -0.091091000 | -0.425221000 |              |              |              |              |
| 45                                       | 0.085353000  | -0.210938000 | -0.006096000 |              |              |              |              |

| <b>PyO</b>                                   |              |              |              | <b>THF</b>                      |              |              |              |
|----------------------------------------------|--------------|--------------|--------------|---------------------------------|--------------|--------------|--------------|
| 6                                            | 0.291298000  | -1.189525000 | -0.000188000 | 6                               | -1.174217000 | -0.433075000 | -0.135694000 |
| 6                                            | -1.116124000 | -1.212065000 | -0.000123000 | 8                               | 0.000004000  | -1.265896000 | 0.000000000  |
| 6                                            | -1.849993000 | 0.000002000  | 0.000094000  | 6                               | 1.174218000  | -0.433069000 | 0.135694000  |
| 6                                            | -1.116116000 | 1.212068000  | 0.000219000  | 6                               | 0.738482000  | 1.006589000  | -0.234389000 |
| 6                                            | 0.291303000  | 1.189526000  | 0.000145000  | 6                               | -0.738487000 | 1.006586000  | 0.234388000  |
| 7                                            | 0.995081000  | -0.000002000 | -0.000042000 | 1                               | -1.535852000 | -0.481407000 | -1.182448000 |
| 1                                            | -2.942045000 | 0.000007000  | 0.000143000  | 1                               | -1.964554000 | -0.830701000 | 0.524467000  |
| 1                                            | 0.923470000  | -2.078191000 | -0.000346000 | 1                               | 1.535853000  | -0.481398000 | 1.182449000  |
| 1                                            | -1.618286000 | -2.182215000 | -0.000239000 | 1                               | 1.964559000  | -0.830692000 | -0.524465000 |
| 1                                            | -1.618275000 | 2.182219000  | 0.000377000  | 1                               | 1.355573000  | 1.774980000  | 0.258325000  |
| 1                                            | 0.923481000  | 2.078188000  | 0.000237000  | 1                               | 0.794515000  | 1.159614000  | -1.325777000 |
| 8                                            | 2.295484000  | -0.000004000 | -0.000096000 | 1                               | -0.794520000 | 1.159609000  | 1.325777000  |
|                                              |              |              |              | 1                               | -1.355583000 | 1.774974000  | -0.258324000 |
| <b>Methyl Migration – Four Coordinate Rh</b> |              |              |              | <b>Rh<sup>I</sup>-methoxide</b> |              |              |              |

|                                                    |              |              |              |              |              |              |              |
|----------------------------------------------------|--------------|--------------|--------------|--------------|--------------|--------------|--------------|
| 6                                                  | -2.365339000 | -1.506796000 | 1.274280000  | 6            | -2.913639000 | -0.859274000 | 0.435869000  |
| 1                                                  | -1.840809000 | -2.451521000 | 1.446066000  | 1            | -2.856760000 | -1.022513000 | 1.531766000  |
| 1                                                  | -2.136496000 | -0.762301000 | 2.059396000  | 1            | -3.927095000 | -1.131587000 | 0.088446000  |
| 1                                                  | -3.446568000 | -1.633418000 | 1.168679000  | 8            | -1.930651000 | -1.696411000 | -0.205238000 |
| 6                                                  | 0.907686000  | 2.038132000  | -0.163438000 | 6            | -2.046174000 | -3.095607000 | 0.148420000  |
| 1                                                  | 1.421617000  | 2.873949000  | 0.344725000  | 1            | -1.142442000 | -3.574034000 | -0.247430000 |
| 1                                                  | 0.785942000  | 2.286634000  | -1.238197000 | 1            | -2.070343000 | -3.207965000 | 1.247803000  |
| 8                                                  | -0.395832000 | 1.821973000  | 0.413845000  | 1            | -2.969359000 | -3.505050000 | -0.301351000 |
| 6                                                  | -1.298311000 | 2.917964000  | 0.159962000  | 7            | -1.264888000 | 0.904240000  | -0.007247000 |
| 1                                                  | -2.243278000 | 2.668193000  | 0.659186000  | 6            | -0.959740000 | 2.221754000  | -0.222666000 |
| 1                                                  | -0.881333000 | 3.850943000  | 0.582483000  | 6            | -2.602673000 | 0.593859000  | 0.110687000  |
| 1                                                  | -1.469471000 | 3.032413000  | -0.925739000 | 6            | -1.925339000 | 3.242299000  | -0.323974000 |
| 7                                                  | 0.913771000  | -0.390200000 | -0.133508000 | 1            | 0.102771000  | 2.448104000  | -0.327757000 |
| 6                                                  | 1.550341000  | -1.598446000 | -0.093717000 | 6            | -3.630094000 | 1.551970000  | -0.010573000 |
| 6                                                  | 1.680417000  | 0.740768000  | -0.021003000 | 6            | -3.299919000 | 2.913376000  | -0.221731000 |
| 6                                                  | 2.945887000  | -1.721408000 | 0.063514000  | 1            | -1.596124000 | 4.270173000  | -0.494255000 |
| 1                                                  | 0.903649000  | -2.470643000 | -0.200320000 | 1            | -4.672446000 | 1.231471000  | 0.069596000  |
| 6                                                  | 3.078148000  | 0.699977000  | 0.161847000  | 1            | -4.077256000 | 3.675713000  | -0.310901000 |
| 6                                                  | 3.735280000  | -0.553829000 | 0.199949000  | 7            | 1.729058000  | 0.340221000  | 0.053617000  |
| 1                                                  | 3.392635000  | -2.717700000 | 0.081572000  | 6            | 2.569804000  | 0.379295000  | -1.020191000 |
| 1                                                  | 3.635533000  | 1.634733000  | 0.262785000  | 6            | 2.104826000  | 1.024764000  | 1.171534000  |
| 1                                                  | 4.817992000  | -0.615455000 | 0.332181000  | 6            | 3.782944000  | 1.102663000  | -1.025337000 |
| 8                                                  | -2.251279000 | -1.570111000 | -0.687533000 | 1            | 2.241832000  | -0.191000000 | -1.890461000 |
| 45                                                 | -1.101413000 | -0.246167000 | -0.243047000 | 6            | 3.304236000  | 1.767946000  | 1.257793000  |
|                                                    |              |              |              | 1            | 1.413066000  | 0.960909000  | 2.013560000  |
|                                                    |              |              |              | 6            | 4.165224000  | 1.815212000  | 0.136328000  |
|                                                    |              |              |              | 1            | 4.404827000  | 1.096596000  | -1.923361000 |
|                                                    |              |              |              | 1            | 3.545852000  | 2.288138000  | 2.187493000  |
|                                                    |              |              |              | 1            | 5.100104000  | 2.381893000  | 0.167058000  |
|                                                    |              |              |              | 8            | 0.844835000  | -2.507319000 | -0.160180000 |
|                                                    |              |              |              | 6            | 2.210153000  | -2.781865000 | 0.003301000  |
|                                                    |              |              |              | 1            | 2.637071000  | -2.363810000 | 0.945675000  |
|                                                    |              |              |              | 1            | 2.365926000  | -3.883067000 | 0.039429000  |
|                                                    |              |              |              | 1            | 2.846342000  | -2.405067000 | -0.834302000 |
|                                                    |              |              |              | 45           | -0.010362000 | -0.697970000 | -0.044423000 |
| <b>Rh<sup>I</sup>-Methoxide - Four- Coordinate</b> |              |              |              |              |              |              |              |
|                                                    | 6            | 1.036881000  | 1.937940000  | 0.540671000  |              |              |              |
|                                                    | 1            | 0.745175000  | 1.982646000  | 1.609146000  |              |              |              |
|                                                    | 1            | 1.728437000  | 2.770207000  | 0.317195000  |              |              |              |
|                                                    | 8            | -0.157771000 | 2.053370000  | -0.268491000 |              |              |              |
|                                                    | 6            | -0.932241000 | 3.222437000  | 0.063851000  |              |              |              |
|                                                    | 1            | -1.782113000 | 3.241372000  | -0.631313000 |              |              |              |
|                                                    | 1            | -1.299100000 | 3.160633000  | 1.104625000  |              |              |              |
|                                                    | 1            | -0.317492000 | 4.131961000  | -0.070836000 |              |              |              |
|                                                    | 7            | 0.774000000  | -0.411427000 | -0.022298000 |              |              |              |
|                                                    | 6            | 1.262527000  | -1.662156000 | -0.275000000 |              |              |              |
|                                                    | 6            | 1.670627000  | 0.594418000  | 0.230535000  |              |              |              |
|                                                    | 6            | 2.642047000  | -1.953267000 | -0.265084000 |              |              |              |
|                                                    | 1            | 0.507449000  | -2.420005000 | -0.489827000 |              |              |              |
|                                                    | 6            | 3.065252000  | 0.384599000  | 0.236932000  |              |              |              |
|                                                    | 6            | 3.570542000  | -0.916074000 | -0.003928000 |              |              |              |
|                                                    | 1            | 2.970863000  | -2.974787000 | -0.467946000 |              |              |              |
|                                                    | 1            | 3.736314000  | 1.225156000  | 0.431945000  |              |              |              |
|                                                    | 1            | 4.645960000  | -1.108669000 | 0.002362000  |              |              |              |
|                                                    | 8            | -2.134165000 | -1.613244000 | -0.268765000 |              |              |              |
|                                                    | 6            | -2.275627000 | -2.420912000 | 0.885791000  |              |              |              |
|                                                    | 1            | -1.300719000 | -2.853562000 | 1.211319000  |              |              |              |
|                                                    | 1            | -2.709957000 | -1.883960000 | 1.755952000  |              |              |              |
|                                                    | 1            | -2.946167000 | -3.272867000 | 0.643968000  |              |              |              |
|                                                    | 45           | -1.140027000 | 0.049754000  | -0.209890000 |              |              |              |

## Iridium – HLL Coordinates

| [(N~O)Ir <sup>I</sup> (Me)(THF)] |              |              |              | [(N~O)Ir <sup>I</sup> (Me)(PyO)] |              |              |              |
|----------------------------------|--------------|--------------|--------------|----------------------------------|--------------|--------------|--------------|
| 6                                | 0.542362000  | -2.165853000 | -0.535238000 | 6                                | 0.391458000  | -1.694211000 | -1.365106000 |
| 1                                | -0.077602000 | -2.534468000 | -1.378553000 | 1                                | -0.360750000 | -1.966754000 | -2.133655000 |
| 1                                | 1.600063000  | -2.300123000 | -0.853532000 | 1                                | 1.349232000  | -1.543768000 | -1.905392000 |
| 1                                | 0.386530000  | -2.858663000 | 0.322828000  | 1                                | 0.528093000  | -2.581856000 | -0.707089000 |
| 6                                | -1.823813000 | 2.037647000  | -0.323464000 | 6                                | -2.436893000 | 1.885972000  | 0.170456000  |
| 1                                | -1.539240000 | 2.134213000  | -1.389784000 | 1                                | -2.431462000 | 2.198741000  | -0.892450000 |
| 1                                | -2.429211000 | 2.913701000  | -0.024392000 | 1                                | -3.077296000 | 2.578330000  | 0.748307000  |
| 8                                | -0.612776000 | 1.977524000  | 0.464721000  | 8                                | -1.080439000 | 1.933626000  | 0.668192000  |
| 6                                | 0.262581000  | 3.082664000  | 0.198736000  | 6                                | -0.450305000 | 3.199067000  | 0.405515000  |
| 1                                | 1.156717000  | 2.931222000  | 0.818326000  | 1                                | 0.575331000  | 3.122982000  | 0.789253000  |
| 1                                | 0.549778000  | 3.105679000  | -0.869572000 | 1                                | -0.421433000 | 3.402026000  | -0.680747000 |
| 1                                | -0.227586000 | 4.036089000  | 0.474971000  | 1                                | -0.992512000 | 4.010234000  | 0.928325000  |
| 7                                | -1.837505000 | -0.403815000 | -0.067783000 | 7                                | -2.034520000 | -0.529834000 | -0.033675000 |
| 6                                | -2.525568000 | -1.586551000 | 0.076991000  | 6                                | -2.494372000 | -1.825223000 | 0.012175000  |
| 6                                | -2.599297000 | 0.752954000  | -0.106804000 | 6                                | -2.946435000 | 0.461581000  | 0.290231000  |
| 6                                | -3.926950000 | -1.658965000 | 0.183758000  | 6                                | -3.811900000 | -2.167628000 | 0.369418000  |
| 1                                | -1.909009000 | -2.482916000 | 0.107281000  | 1                                | -1.761572000 | -2.586785000 | -0.249260000 |
| 6                                | -4.001999000 | 0.751408000  | 0.021910000  | 6                                | -4.270499000 | 0.185609000  | 0.683021000  |
| 6                                | -4.700500000 | -0.472771000 | 0.160663000  | 6                                | -4.735407000 | -1.152042000 | 0.719657000  |
| 1                                | -4.393553000 | -2.640955000 | 0.293848000  | 1                                | -4.096175000 | -3.222737000 | 0.376564000  |
| 1                                | -4.535552000 | 1.705622000  | 0.006751000  | 1                                | -4.928024000 | 1.017896000  | 0.948389000  |
| 1                                | -5.788503000 | -0.496869000 | 0.254376000  | 1                                | -5.761206000 | -1.387114000 | 1.012312000  |
| 8                                | 2.247860000  | 0.165317000  | 0.148815000  | 8                                | 1.751151000  | 0.807032000  | -0.592470000 |
| 6                                | 3.069824000  | 0.283794000  | -1.053415000 | 7                                | 2.829436000  | 0.208106000  | -0.065013000 |
| 6                                | 3.008171000  | -0.530494000 | 1.199274000  | 6                                | 4.064747000  | 0.660582000  | -0.457231000 |
| 6                                | 4.510586000  | 0.337688000  | -0.509906000 | 6                                | 2.707634000  | -0.797219000 | 0.864070000  |
| 1                                | 2.738034000  | 1.190088000  | -1.578866000 | 6                                | 5.236598000  | 0.106505000  | 0.083778000  |
| 6                                | 4.448924000  | -0.697590000 | 0.644332000  | 1                                | 4.040155000  | 1.454691000  | -1.204329000 |
| 1                                | 2.959732000  | 0.111341000  | 2.093015000  | 6                                | 3.859429000  | -1.382252000 | 1.425336000  |
| 1                                | 5.255452000  | 0.080124000  | -1.279146000 | 1                                | 1.665265000  | -1.055908000 | 1.084755000  |
| 1                                | 5.211509000  | -0.522788000 | 1.418984000  | 6                                | 5.147293000  | -0.936841000 | 1.042266000  |
| 1                                | 2.508429000  | -1.484761000 | 1.411304000  | 1                                | 6.200444000  | 0.491395000  | -0.255209000 |
| 1                                | 4.736060000  | 1.345637000  | -0.123128000 | 1                                | 3.727166000  | -2.179783000 | 2.159275000  |
| 1                                | 2.899152000  | -0.593058000 | -1.699224000 | 1                                | 6.047713000  | -1.382361000 | 1.471417000  |
| 1                                | 4.589049000  | -1.715743000 | 0.246580000  | 77                               | -0.166249000 | 0.009016000  | -0.348921000 |
| 77                               | 0.110463000  | -0.221337000 | -0.031518000 |                                  |              |              |              |
| OAT <sup>‡</sup> - Ir            |              |              |              |                                  |              |              |              |
|                                  | 6            | 0.441079000  | -1.793383000 | -1.097263000                     |              |              |              |
|                                  | 1            | -0.255759000 | -2.106529000 | -1.899576000                     |              |              |              |
|                                  | 1            | 1.436812000  | -1.655853000 | -1.561023000                     |              |              |              |
|                                  | 1            | 0.526584000  | -2.630891000 | -0.369616000                     |              |              |              |
|                                  | 6            | -2.484386000 | 1.887559000  | -0.080337000                     |              |              |              |
|                                  | 1            | -2.277807000 | 2.105935000  | -1.146976000                     |              |              |              |
|                                  | 1            | -3.200539000 | 2.634227000  | 0.310944000                      |              |              |              |
|                                  | 8            | -1.243702000 | 1.956049000  | 0.652557000                      |              |              |              |

|    |              |              |              |
|----|--------------|--------------|--------------|
| 6  | -0.550474000 | 3.197712000  | 0.441451000  |
| 1  | 0.400592000  | 3.118619000  | 0.983292000  |
| 1  | -0.344022000 | 3.350450000  | -0.633310000 |
| 1  | -1.150883000 | 4.039179000  | 0.837632000  |
| 7  | -2.123793000 | -0.539616000 | -0.032748000 |
| 6  | -2.602761000 | -1.821214000 | 0.092783000  |
| 6  | -3.045638000 | 0.484950000  | 0.070551000  |
| 6  | -3.959813000 | -2.121050000 | 0.315744000  |
| 1  | -1.855973000 | -2.609945000 | 0.003643000  |
| 6  | -4.415657000 | 0.255568000  | 0.300937000  |
| 6  | -4.903435000 | -1.069680000 | 0.420574000  |
| 1  | -4.260847000 | -3.167858000 | 0.401916000  |
| 1  | -5.088484000 | 1.112681000  | 0.388735000  |
| 1  | -5.963235000 | -1.267971000 | 0.595706000  |
| 8  | 1.444387000  | 0.881074000  | -0.454349000 |
| 7  | 2.975580000  | 0.232821000  | -0.000097000 |
| 6  | 3.071976000  | -0.800723000 | 0.853821000  |
| 6  | 4.056694000  | 0.790147000  | -0.571352000 |
| 6  | 4.334537000  | -1.346370000 | 1.188680000  |
| 1  | 2.115264000  | -1.163226000 | 1.245331000  |
| 6  | 5.356588000  | 0.312528000  | -0.286716000 |
| 1  | 3.855635000  | 1.617183000  | -1.259473000 |
| 6  | 5.495577000  | -0.779470000 | 0.608081000  |
| 1  | 4.394887000  | -2.188726000 | 1.881420000  |
| 1  | 6.223919000  | 0.778848000  | -0.759576000 |
| 1  | 6.485960000  | -1.178391000 | 0.845043000  |
| 77 | -0.173712000 | -0.058657000 | -0.191709000 |

| [N-O]Ir <sup>III</sup> (O)(Me) |              |              |              | [(N-O)Ir <sup>III</sup> (Py)(O)(Me)] |              |              |              |
|--------------------------------|--------------|--------------|--------------|--------------------------------------|--------------|--------------|--------------|
| 6                              | -1.096994000 | -1.686707000 | 1.480032000  | 8                                    | 0.251798000  | -2.105174000 | -0.182566000 |
| 1                              | -0.462133000 | -1.330612000 | 2.310409000  | 6                                    | 0.098281000  | 0.700714000  | 1.918067000  |
| 1                              | -2.129635000 | -1.839486000 | 1.830516000  | 1                                    | 0.209090000  | 1.803698000  | 1.831688000  |
| 1                              | -0.706540000 | -2.667913000 | 1.127925000  | 1                                    | -0.835387000 | 0.499172000  | 2.475572000  |
| 6                              | 1.021392000  | 1.857326000  | 0.789739000  | 1                                    | 0.935935000  | 0.330239000  | 2.534754000  |
| 1                              | 0.092112000  | 1.601633000  | 1.329939000  | 6                                    | -2.075934000 | 2.058024000  | -0.104347000 |
| 1                              | 1.679842000  | 2.440363000  | 1.465452000  | 1                                    | -2.703415000 | 2.783897000  | -0.655093000 |
| 8                              | 0.732526000  | 2.606428000  | -0.393683000 | 1                                    | -1.980269000 | 2.409501000  | 0.942029000  |
| 6                              | -0.272681000 | 3.607105000  | -0.165525000 | 8                                    | -0.777768000 | 1.972512000  | -0.703200000 |
| 1                              | -0.396104000 | 4.147596000  | -1.115728000 | 6                                    | -0.093639000 | 3.232402000  | -0.719564000 |
| 1                              | -1.231481000 | 3.138099000  | 0.119220000  | 1                                    | 0.865504000  | 3.059570000  | -1.227017000 |
| 1                              | 0.047118000  | 4.322360000  | 0.620165000  | 1                                    | -0.679218000 | 3.983037000  | -1.283931000 |
| 7                              | 0.982166000  | -0.462579000 | -0.105748000 | 1                                    | 0.085766000  | 3.607118000  | 0.306531000  |
| 6                              | 1.622235000  | -1.585911000 | -0.551459000 | 7                                    | -1.953570000 | -0.415856000 | -0.010009000 |
| 6                              | 1.736288000  | 0.582099000  | 0.367194000  | 6                                    | -2.535692000 | -1.647780000 | 0.030281000  |
| 6                              | 3.021184000  | -1.731697000 | -0.529091000 | 6                                    | -2.746755000 | 0.686497000  | -0.126040000 |
| 1                              | 0.981654000  | -2.377903000 | -0.946680000 | 6                                    | -3.933318000 | -1.821721000 | -0.037873000 |
| 6                              | 3.147717000  | 0.500140000  | 0.403081000  | 1                                    | -1.806534000 | -2.463402000 | 0.094150000  |
| 6                              | 3.812064000  | -0.664373000 | -0.041285000 | 6                                    | -4.153804000 | 0.587786000  | -0.223160000 |
| 1                              | 3.465810000  | -2.658217000 | -0.897611000 | 6                                    | -4.765755000 | -0.685533000 | -0.167923000 |
| 1                              | 3.707627000  | 1.360566000  | 0.775178000  | 1                                    | -4.348088000 | -2.831023000 | 0.005902000  |
| 1                              | 4.902116000  | -0.733709000 | -0.017430000 | 1                                    | -4.750432000 | 1.496629000  | -0.335334000 |
| 8                              | -2.306386000 | 0.767938000  | -0.213645000 | 1                                    | -5.852709000 | -0.784622000 | -0.230040000 |
| 77                             | -1.067297000 | -0.447111000 | -0.149592000 | 7                                    | 2.189505000  | -0.198625000 | -0.020543000 |
|                                |              |              |              | 6                                    | 2.907383000  | 0.883981000  | 0.384100000  |
|                                |              |              |              | 6                                    | 2.873106000  | -1.265411000 | -0.527147000 |
|                                |              |              |              | 6                                    | 4.313605000  | 0.961716000  | 0.289433000  |
|                                |              |              |              | 6                                    | 4.280266000  | -1.271596000 | -0.654557000 |
|                                |              |              |              | 6                                    | 5.023023000  | -0.139233000 | -0.246887000 |
|                                |              |              |              | 1                                    | 2.330631000  | 1.711714000  | 0.798569000  |
|                                |              |              |              | 1                                    | 2.225796000  | -2.106374000 | -0.792135000 |
|                                |              |              |              | 1                                    | 4.825513000  | 1.863673000  | 0.632250000  |

|                               |              |              |              |              |
|-------------------------------|--------------|--------------|--------------|--------------|
|                               | 1            | 4.771109000  | -2.154104000 | -1.071105000 |
|                               | 1            | 6.112460000  | -0.113592000 | -0.342719000 |
|                               | 77           | 0.103972000  | -0.278072000 | 0.061424000  |
| <b>Methyl Migration* - Ir</b> |              |              |              |              |
| 8                             | 0.285882000  | -2.101576000 | 0.146385000  |              |
| 6                             | 0.292696000  | -1.360593000 | 1.932224000  |              |
| 1                             | 0.231521000  | -0.396013000 | 2.488040000  |              |
| 1                             | -0.545138000 | -2.001597000 | 2.226564000  |              |
| 1                             | 1.261598000  | -1.832003000 | 2.122742000  |              |
| 6                             | -1.945845000 | 2.102585000  | 0.231824000  |              |
| 1                             | -2.496624000 | 2.973106000  | -0.169300000 |              |
| 1                             | -1.797481000 | 2.239471000  | 1.322773000  |              |
| 8                             | -0.650155000 | 2.008965000  | -0.398001000 |              |
| 6                             | 0.157905000  | 3.169478000  | -0.146909000 |              |
| 1                             | 1.099290000  | 3.023078000  | -0.691969000 |              |
| 1                             | -0.352656000 | 4.076192000  | -0.522097000 |              |
| 1                             | 0.359460000  | 3.274841000  | 0.936305000  |              |
| 7                             | -1.956339000 | -0.323421000 | -0.063018000 |              |
| 6                             | -2.587562000 | -1.525119000 | -0.211311000 |              |
| 6                             | -2.712774000 | 0.815756000  | -0.027202000 |              |
| 6                             | -3.988808000 | -1.625076000 | -0.330913000 |              |
| 1                             | -1.899131000 | -2.375559000 | -0.225819000 |              |
| 6                             | -4.115572000 | 0.795979000  | -0.172946000 |              |
| 6                             | -4.776026000 | -0.448263000 | -0.320060000 |              |
| 1                             | -4.444342000 | -2.611612000 | -0.442255000 |              |
| 1                             | -4.674334000 | 1.735357000  | -0.161405000 |              |
| 1                             | -5.862654000 | -0.493840000 | -0.427844000 |              |
| 7                             | 2.110856000  | -0.059624000 | -0.115900000 |              |
| 6                             | 2.872694000  | 0.858477000  | 0.544701000  |              |
| 6                             | 2.760727000  | -1.012981000 | -0.851755000 |              |
| 6                             | 4.279287000  | 0.903444000  | 0.462640000  |              |
| 6                             | 4.167883000  | -1.036238000 | -0.990443000 |              |
| 6                             | 4.949733000  | -0.059676000 | -0.333190000 |              |
| 1                             | 2.320372000  | 1.566316000  | 1.165568000  |              |
| 1                             | 2.109866000  | -1.757560000 | -1.306443000 |              |
| 1                             | 4.825641000  | 1.669878000  | 1.017259000  |              |
| 1                             | 4.627206000  | -1.815601000 | -1.602808000 |              |
| 1                             | 6.039419000  | -0.051746000 | -0.426871000 |              |
| 77                            | 0.063695000  | -0.172301000 | -0.009832000 |              |

|                                               |              |              |              |                                 |              |              |              |
|-----------------------------------------------|--------------|--------------|--------------|---------------------------------|--------------|--------------|--------------|
| <b>PyO</b>                                    |              |              |              | <b>THF</b>                      |              |              |              |
| 6                                             | 0.291298000  | -1.189525000 | -0.000188000 | 6                               | -1.174217000 | -0.433075000 | -0.135694000 |
| 6                                             | -1.116124000 | -1.212065000 | -0.000123000 | 8                               | 0.000004000  | -1.265896000 | 0.000000000  |
| 6                                             | -1.849993000 | 0.000002000  | 0.000094000  | 6                               | 1.174218000  | -0.433069000 | 0.135694000  |
| 6                                             | -1.116116000 | 1.212068000  | 0.000219000  | 6                               | 0.738482000  | 1.006589000  | -0.234389000 |
| 6                                             | 0.291303000  | 1.189526000  | 0.000145000  | 6                               | -0.738487000 | 1.006586000  | 0.234388000  |
| 7                                             | 0.995081000  | -0.000002000 | -0.000042000 | 1                               | -1.535852000 | -0.481407000 | -1.182448000 |
| 1                                             | -2.942045000 | 0.000007000  | 0.000143000  | 1                               | -1.964554000 | -0.830701000 | 0.524467000  |
| 1                                             | 0.923470000  | -2.078191000 | -0.000346000 | 1                               | 1.535853000  | -0.481398000 | 1.182449000  |
| 1                                             | -1.618286000 | -2.182215000 | -0.000239000 | 1                               | 1.964559000  | -0.830692000 | -0.524465000 |
| 1                                             | -1.618275000 | 2.182219000  | 0.000377000  | 1                               | 1.355573000  | 1.774980000  | 0.258325000  |
| 1                                             | 0.923481000  | 2.078188000  | 0.000237000  | 1                               | 0.794515000  | 1.159614000  | -1.325777000 |
| 8                                             | 2.295484000  | -0.000004000 | -0.000096000 | 1                               | -0.794520000 | 1.159609000  | 1.325777000  |
|                                               |              |              |              | 1                               | -1.355583000 | 1.774974000  | -0.258324000 |
| <b>Methyl Migration – Four Coordinate -Ir</b> |              |              |              | <b>Ir<sup>I</sup>-Methoxide</b> |              |              |              |
| 6                                             | -2.462725000 | -1.202942000 | 1.337906000  | 6                               | -2.918555000 | -0.728433000 | 0.439298000  |
| 1                                             | -2.183449000 | -2.246666000 | 1.500812000  | 1                               | -2.867079000 | -0.897027000 | 1.533407000  |
| 1                                             | -2.077913000 | -0.544304000 | 2.131984000  | 1                               | -3.925595000 | -1.002454000 | 0.078570000  |
| 1                                             | -3.535634000 | -1.054042000 | 1.185592000  | 8                               | -1.928940000 | -1.579323000 | -0.194427000 |
| 6                                             | 1.227938000  | 2.043713000  | -0.138358000 | 6                               | -2.040504000 | -2.974209000 | 0.191250000  |

|    |              |              |              |    |              |              |              |
|----|--------------|--------------|--------------|----|--------------|--------------|--------------|
| 1  | 1.747652000  | 2.875636000  | 0.368680000  | 1  | -1.160265000 | -3.470116000 | -0.232832000 |
| 1  | 1.100352000  | 2.286872000  | -1.213138000 | 1  | -2.019638000 | -3.062689000 | 1.291743000  |
| 8  | -0.081127000 | 1.840983000  | 0.441976000  | 1  | -2.984703000 | -3.377874000 | -0.215091000 |
| 6  | -0.983816000 | 2.935325000  | 0.165931000  | 7  | -1.238483000 | 1.002048000  | -0.001850000 |
| 1  | -1.928923000 | 2.696692000  | 0.668561000  | 6  | -0.914268000 | 2.326348000  | -0.197138000 |
| 1  | -0.557424000 | 3.869965000  | 0.573491000  | 6  | -2.591185000 | 0.717134000  | 0.111525000  |
| 1  | -1.151240000 | 3.025391000  | -0.921473000 | 6  | -1.866991000 | 3.355653000  | -0.292856000 |
| 7  | 1.139719000  | -0.370965000 | -0.059360000 | 1  | 0.151004000  | 2.541171000  | -0.288250000 |
| 6  | 1.743318000  | -1.604480000 | -0.026083000 | 6  | -3.598819000 | 1.691787000  | -0.012084000 |
| 6  | 1.963092000  | 0.732741000  | 0.018566000  | 6  | -3.249843000 | 3.051200000  | -0.209497000 |
| 6  | 3.134590000  | -1.771360000 | 0.095750000  | 1  | -1.518732000 | 4.380191000  | -0.445745000 |
| 1  | 1.064368000  | -2.454172000 | -0.105426000 | 1  | -4.645828000 | 1.384477000  | 0.061330000  |
| 6  | 3.359765000  | 0.639506000  | 0.170111000  | 1  | -4.013937000 | 3.826215000  | -0.298620000 |
| 6  | 3.975320000  | -0.635351000 | 0.205950000  | 7  | 1.704535000  | 0.428326000  | 0.066472000  |
| 1  | 3.541861000  | -2.784626000 | 0.110431000  | 6  | 2.469115000  | 0.616861000  | -1.053943000 |
| 1  | 3.950504000  | 1.556296000  | 0.244272000  | 6  | 2.164361000  | 0.961455000  | 1.239814000  |
| 1  | 5.057393000  | -0.736701000 | 0.313236000  | 6  | 3.679288000  | 1.340910000  | -1.045097000 |
| 8  | -2.250226000 | -1.268652000 | -0.581781000 | 1  | 2.073315000  | 0.167889000  | -1.964721000 |
| 77 | -0.858437000 | -0.198638000 | -0.185736000 | 6  | 3.366072000  | 1.696528000  | 1.331352000  |
|    |              |              |              | 1  | 1.533791000  | 0.779364000  | 2.110097000  |
|    |              |              |              | 6  | 4.146921000  | 1.898686000  | 0.169059000  |
|    |              |              |              | 1  | 4.234784000  | 1.456356000  | -1.978595000 |
|    |              |              |              | 1  | 3.671819000  | 2.093894000  | 2.301858000  |
|    |              |              |              | 1  | 5.081797000  | 2.464211000  | 0.207451000  |
|    |              |              |              | 8  | 0.840512000  | -2.401157000 | -0.135802000 |
|    |              |              |              | 6  | 2.227176000  | -2.638337000 | -0.177032000 |
|    |              |              |              | 1  | 2.772812000  | -2.196691000 | 0.687903000  |
|    |              |              |              | 1  | 2.410084000  | -3.733267000 | -0.154535000 |
|    |              |              |              | 1  | 2.711683000  | -2.250702000 | -1.103200000 |
|    |              |              |              | 77 | -0.016842000 | -0.586561000 | -0.030769000 |

**Ir<sup>I</sup>-Methoxide – Four Coordinate**

|    |              |              |              |
|----|--------------|--------------|--------------|
| 6  | 1.395390000  | 1.880301000  | 0.547576000  |
| 1  | 1.099786000  | 1.964803000  | 1.611749000  |
| 1  | 2.079317000  | 2.706450000  | 0.285064000  |
| 8  | 0.197657000  | 1.943349000  | -0.267543000 |
| 6  | -0.608507000 | 3.109895000  | 0.013142000  |
| 1  | -1.451705000 | 3.078062000  | -0.687496000 |
| 1  | -0.979347000 | 3.076898000  | 1.052268000  |
| 1  | -0.002303000 | 4.018331000  | -0.156988000 |
| 7  | 1.068483000  | -0.443851000 | -0.025998000 |
| 6  | 1.529890000  | -1.717007000 | -0.257869000 |
| 6  | 2.004765000  | 0.527026000  | 0.263623000  |
| 6  | 2.894588000  | -2.052331000 | -0.202254000 |
| 1  | 0.758265000  | -2.452444000 | -0.487124000 |
| 6  | 3.387427000  | 0.263575000  | 0.314938000  |
| 6  | 3.856531000  | -1.052139000 | 0.088343000  |
| 1  | 3.188516000  | -3.086746000 | -0.392665000 |
| 1  | 4.078256000  | 1.081250000  | 0.536475000  |
| 1  | 4.922745000  | -1.284960000 | 0.130401000  |
| 8  | -2.318732000 | -1.195118000 | -0.195729000 |
| 6  | -2.879658000 | -1.868066000 | 0.934999000  |
| 1  | -2.424107000 | -2.874564000 | 1.032536000  |
| 1  | -2.737201000 | -1.319313000 | 1.882940000  |
| 1  | -3.964183000 | -1.999797000 | 0.752275000  |
| 77 | -0.838459000 | -0.004343000 | -0.154367000 |

**Table S-2. Computed Stationary Points. Stoichiometry - charge (if any) and multiplicity (other than singlet) noted.  $\nu_i$  = number of imaginary frequencies; a.u. = atomic units.**

| File Name        | Stoichiometry      | G(a.u.)   | $\nu_i$ | Comment                         |
|------------------|--------------------|-----------|---------|---------------------------------|
| THF              | C4H8O              | -43.2848  | 0       | THF                             |
| Py               | C5H5N              | -41.0765  | 0       | pyridine                        |
| PyO              | C5H5NO             | -56.9906  | 0       | Py-N-oxide                      |
| 4CN_Ni.out       | C8H12NNiO2(1+,3)   | -263.4316 | 0       | triplet (N~O)Ni(OMe)            |
| 4CN_Ni           | C8H12NNiO2(1+)     | -263.4027 | 0       | (N~O)Ni(OMe)                    |
| OxoA_Ni.out      | C8H12NNiO2(1+,3)   | -263.3481 | 0       | (N~O)Ni(Me)O triplet            |
| co4_ts_Ni.out    | C8H12NNiO2(1+,3)   | -263.3470 | 1       | 4 coord Me migration TS triplet |
| PyOxoA_Ni        | C8H12NNiO2(1+)     | -263.3151 | 0       | (N~O)Ni(Me)O                    |
| co4_ts_Ni        | C8H12NNiO2(1+)     | -263.3130 | 1       | 4 coord Me migration TS Ni      |
| 4CN_Co           | C8H12CoNO2         | -239.2502 | 0       | (N~O)Co(OMe)                    |
| OxoA_Co          | C8H12CoNO2         | -239.2203 | 0       | (N~O)Co(Me)O                    |
| co_ts_Co         | C8H12CoNO2         | -239.1920 | 1       | 4 coord Me migration TS Co      |
| productFromCO_Pd | C8H12NO2Pd(1+)     | -221.2123 | 0       | (N~O)Pd(OMe)                    |
| co_ts_Pd         | C8H12NO2Pd(1+)     | -221.1085 | 1       | 4 coord Me migration TS Pd      |
| PyOxoA_Pd        | C8H12NO2Pd(1+)     | -221.1076 | 0       | (N~O)Pd(Me)O                    |
| productFromCO    | C8H12NO2Pt(1+)     | -213.6399 | 0       | (N~O)Pt(OMe)                    |
| op_oxo           | C8H12NO2Pt(1+)     | -213.5828 | 0       | (N~O)Pt(Me)O                    |
| co_ts_031511     | C8H12NO2Pt(1+)     | -213.5558 | 1       | 4 coord Me migration TS Pt      |
| 7_product_4      | C8H12NO2Rh         | -204.1791 | 0       | (N~O)Rh(OMe)                    |
| 5_Oxo_4          | C8H12NO2Rh         | -204.1475 | 0       | (N~O)Rh(Me)O                    |
| 6_co_4           | C8H12NO2Rh         | -204.1048 | 1       | 4 coord Me migration Rh         |
| productFromCO_ir | C8H12IrNO2         | -198.9119 | 0       | (N~O)Ir(OMe)                    |
| PyOxoA_ir        | C8H12IrNO2         | -198.9081 | 0       | (N~O)Ir(Me)O                    |
| newA_co_ts_ir    | C8H12IrNO2         | -198.8493 | 0       | 4 coord Me migration TS Ir      |
| adduct_Ni        | C12H20NNiO2(1+)    | -290.7324 | 0       | THF complex of Ni               |
| precursor_Ni     | C12H20NNiO2(1+,3)  | -290.7301 | 0       | triplet THF complex of Ni       |
| adduct_CoA_tight | C12H20CoNO2        | -266.5323 | 1       | THF complex of Co               |
| reactantA_mci_Pd | C12H20NO2Pd(1+)    | -248.5685 | 0       | THF complex of Pd               |
| reactant_mciA    | C12H20NO2Pt(1+)    | -241.0063 | 0       | THF complex of Pt               |
| 2_precuser       | C12H20NO2Rh        | -231.4901 | 0       | THF complex of Rh               |
| reactant_mciA_ir | C12H20IrNO2        | -226.2270 | 0       | THF complex of Ir               |
| 5CN_Ni.out       | C13H17N2NiO2(1+,3) | -304.5300 | 0       | (N~O)Ni(Py)(OMe) triplet        |
| 5CN_Ni           | C13H17N2NiO2(1+)   | -304.5205 | 0       | (N~O)Ni(Py)(OMe) singlet        |
| mci_a_Ni         | C13H17N2NiO2(1+)   | -304.4585 | 0       | (N~O)Ni(PyO)(Me) singlet        |
| adduct_a_ni.out  | C13H17N2NiO2(1+,3) | -304.4575 | 0       | (N~O)Ni(PyO)(Me) triplet        |
| Oxo5_Ni.out      | C13H17N2NiO2(1+,3) | -304.4292 | 0       | triplet oxo intermediate Ni     |
| co5_ts_Ni.out    | C13H17N2NiO2(1+,3) | -304.4282 | 1       | migration TS triplet Ni         |
| PyOxo5_Ni        | C13H17N2NiO2(1+)   | -304.4133 | 0       | singlet oxo intermediate Ni     |
| co5_ts_Ni        | C13H17N2NiO2(1+)   | -304.4121 | 1       | migration TS Ni                 |
| no_ts4_Ni        | C13H17N2NiO2(1+)   | -304.3858 | 1       | OAT TS Ni                       |
| 5CN_Co           | C13H17CoN2O2       | -280.3426 | 0       | (N~O)Co(Py)(OMe)                |
| Oxo5_Co          | C13H17CoN2O2       | -280.3005 | 0       | singlet oxo intermediate Co     |
| co_ts5_Co        | C13H17CoN2O2       | -280.2601 | 1       | migration TS Co                 |
| mciA_Co          | C13H17CoN2O2       | -280.2515 | 0       | (N~O)Co(PyO)(Me) singlet        |
| oat_ts_Co        | C13H17CoN2O2       | -280.2300 | 1       | OAT TS Co                       |
| product_Pd       | C13H17N2O2Pd(1+)   | -262.3335 | 0       | (N~O)Pd(Py)(OMe)                |
| bisPyInterMa_Pd  | C13H17N2O2Pd(1+)   | -262.2919 | 0       | (N~O)Pt(PyO)(Me) singlet        |

|                 |                  |           |   |                             |
|-----------------|------------------|-----------|---|-----------------------------|
| PyOxo5_Pd       | C13H17N2O2Pd(1+) | -262.2322 | 0 | singlet oxo intermediate Pd |
| co_ts5cn_Pd     | C13H17N2O2Pd(1+) | -262.2250 | 1 | migration TS Pd             |
| no_ts_Pd        | C13H17N2O2Pd(1+) | -262.1966 | 1 | OAT TS Pd                   |
| productA        | C13H17N2O2Pt(1+) | -254.7748 | 0 | (N~O)Pt(Py)(OMe)            |
| bisPyInterMa    | C13H17N2O2Pt(1+) | -254.7318 | 0 | (N~O)Pt(PyO)(Me) singlet    |
| PyOxo5          | C13H17N2O2Pt(1+) | -254.6913 | 0 | singlet oxo intermediate Pt |
| co_ts5cn        | C13H17N2O2Pt(1+) | -254.6710 | 1 | migration TS Pt             |
| no_tsa3         | C13H17N2O2Pt(1+) | -254.6533 | 1 | OAT TS Pt                   |
| 7_product_5     | C13H17N2O2Rh     | -245.2803 | 0 | (N~O)Ir(Py)(OMe)            |
| 5_Oxo_5         | C13H17N2O2Rh     | -245.2336 | 0 | singlet oxo intermediate Rh |
| 3_MCI           | C13H17N2O2Rh     | -245.2037 | 0 | (N~O)Rh(PyO)(Me) singlet    |
| 6_co_5          | C13H17N2O2Rh     | -245.1910 | 1 | migration TS Rh             |
| 4_OAT           | C13H17N2O2Rh     | -245.1798 | 1 | OAT TS Rh                   |
| product_ir      | C13H17IrN2O2     | -240.0167 | 0 | (N~O)Ir(Py)(OMe)            |
| PyOxo5_ir       | C13H17IrN2O2     | -239.9876 | 0 | singlet oxo intermediate Ir |
| bisPyInterMa_ir | C13H17IrN2O2     | -239.9472 | 0 | (N~O)Ir(PyO)(Me) singlet    |
| no_ts4_ir       | C13H17IrN2O2     | -239.9297 | 1 | OAT TS Ir                   |
| co_ts5cn        | C13H17IrN2O2     | -239.9283 | 1 | migration TS Ir             |
